# Supplementary material for: Revealing the millipede and other soil-macrofaunal biodiversity in Hong Kong using a citizen science approach
Source: Biodivers Data J. 2022 Oct 4;10:e82518. doi: 10.3897/BDJ.10.e82518 (PMC9836596; doi:10.3897/BDJ.10.e82518)
Supplement: Supplementary material 2 — Soil biodiversity dataset in Hong Kong during Oct 2019 - Oct 2020 [file bdj-10-e82518-s002.csv]

Record identifier	Phylum	Class	Order	Family	Species Name	Latitude	Longitude	Datum	Location Code	Country	District	Date	Season	NCBI Accession Number	Barcoding gene
1	Arthropoda	Diplopoda	Polydesmida	Paradoxosomatidae	Orthomorpha coarctata (Saussure, 1860)	22.2869	114.138	WGS84	B	China	Hong Kong Island	27 09 2019	autumn	MW377593	COI
2	Arthropoda	Diplopoda	Polydesmida	Paradoxosomatidae	Orthomorpha coarctata (Saussure, 1860)	22.2869	114.138	WGS84	B	China	Hong Kong Island	27 09 2019	autumn	MW377594	COI
3	Arthropoda	Diplopoda	Spirobolida	Pachybolidae	Trigoniulus corallinus (Shelley & Lehtinen, 1999)	22.2145	114.2159	WGS84	C	China	Hong Kong Island	24 10 2019	autumn	MW384990	COI
4	Arthropoda	Diplopoda	Spirobolida	Pachybolidae	Trigoniulus corallinus (Shelley & Lehtinen, 1999)	22.2145	114.2159	WGS84	C	China	Hong Kong Island	24 10 2019	autumn	MW384991	COI
5	Arthropoda	Diplopoda	Spirobolida	Pachybolidae	Trigoniulus corallinus (Shelley & Lehtinen, 1999)	22.2145	114.2159	WGS84	C	China	Hong Kong Island	24 10 2019	autumn	MW384992	COI
6	Arthropoda	Diplopoda	Spirobolida	Pachybolidae	Trigoniulus corallinus (Shelley & Lehtinen, 1999)	22.3961	113.9643	WGS84	E	China	Kowloon & New Territories	22 10 2019	autumn	MW384993	COI
7	Arthropoda	Diplopoda	Spirobolida	Pachybolidae	Trigoniulus corallinus (Shelley & Lehtinen, 1999)	22.3961	113.9643	WGS84	E	China	Kowloon & New Territories	22 10 2019	autumn	MW384994	COI
8	Arthropoda	Diplopoda	Spirobolida	Pachybolidae	Trigoniulus corallinus (Shelley & Lehtinen, 1999)	22.2145	114.2159	WGS84	C	China	Hong Kong Island	7 11 2019	autumn	MW384995	COI
9	Arthropoda	Diplopoda	Spirobolida	Pachybolidae	Trigoniulus corallinus (Shelley & Lehtinen, 1999)	22.2145	114.2159	WGS84	C	China	Hong Kong Island	7 11 2019	autumn	MW384996	COI
10	Arthropoda	Diplopoda	Spirobolida	Pachybolidae	Trigoniulus corallinus (Shelley & Lehtinen, 1999)	22.2904	113.947	WGS84	D	China	Islands	8 11 2019	autumn	MW384997	COI
11	Arthropoda	Diplopoda	Spirobolida	Pachybolidae	Trigoniulus corallinus (Shelley & Lehtinen, 1999)	22.2904	113.947	WGS84	D	China	Islands	8 11 2019	autumn	MW384998	COI
12	Arthropoda	Diplopoda	Spirobolida	Pachybolidae	Trigoniulus corallinus (Shelley & Lehtinen, 1999)	22.3961	113.9643	WGS84	E	China	Kowloon & New Territories	26 11 2019	autumn	MW384999	COI
13	Arthropoda	Diplopoda	Spirobolida	Pachybolidae	Trigoniulus corallinus (Shelley & Lehtinen, 1999)	22.3961	113.9643	WGS84	E	China	Kowloon & New Territories	26 11 2019	autumn	MW385000	COI
14	Arthropoda	Diplopoda	Spirobolida	Pachybolidae	Trigoniulus corallinus (Shelley & Lehtinen, 1999)	22.3961	113.9643	WGS84	E	China	Kowloon & New Territories	26 11 2019	autumn	MW385001	COI
15	Arthropoda	Diplopoda	Spirobolida	Pachybolidae	Trigoniulus corallinus (Shelley & Lehtinen, 1999)	22.3957	113.9636	WGS84	E	China	Kowloon & New Territories	28 11 2019	autumn	MW385002	COI
16	Arthropoda	Diplopoda	Spirobolida	Pachybolidae	Trigoniulus corallinus (Shelley & Lehtinen, 1999)	22.4538	114.1631	WGS84	O	China	Kowloon & New Territories	19 12 2019	winter	MW385003	COI
17	Arthropoda	Diplopoda	Spirobolida	Pachybolidae	Trigoniulus corallinus (Shelley & Lehtinen, 1999)	22.3206	114.186	WGS84	G	China	Kowloon & New Territories	23 12 2019	winter	MW385004	COI
18	Arthropoda	Diplopoda	Spirobolida	Pachybolidae	Trigoniulus corallinus (Shelley & Lehtinen, 1999)	22.3206	114.186	WGS84	G	China	Kowloon & New Territories	23 12 2019	winter	MW385005	COI
19	Arthropoda	Diplopoda	Spirobolida	Pachybolidae	Trigoniulus corallinus (Shelley & Lehtinen, 1999)	22.2904	113.947	WGS84	D	China	Islands	5 12 2019	winter	MW385006	COI
20	Arthropoda	Diplopoda	Spirobolida	Pachybolidae	Trigoniulus corallinus (Shelley & Lehtinen, 1999)	22.3957	113.9636	WGS84	E	China	Kowloon & New Territories	30 12 2019	winter	MW385007	COI
21	Arthropoda	Diplopoda	Spirobolida	Pachybolidae	Trigoniulus corallinus (Shelley & Lehtinen, 1999)	22.3957	113.9636	WGS84	E	China	Kowloon & New Territories	21 01 2020	winter	MW385008	COI
22	Arthropoda	Diplopoda	Spirobolida	Pachybolidae	Trigoniulus corallinus (Shelley & Lehtinen, 1999)	22.4538	114.1631	WGS84	O	China	Kowloon & New Territories	21 02 2020	winter	MW385009	COI
23	Arthropoda	Diplopoda	Spirobolida	Pachybolidae	Trigoniulus corallinus (Shelley & Lehtinen, 1999)	22.3961	113.9643	WGS84	E	China	Kowloon & New Territories	20 02 2020	winter	MW385010	COI
24	Arthropoda	Diplopoda	Spirobolida	Pachybolidae	Trigoniulus corallinus (Shelley & Lehtinen, 1999)	22.3957	113.9636	WGS84	E	China	Kowloon & New Territories	20 02 2020	winter	MW385011	COI
25	Arthropoda	Diplopoda	Spirobolida	Pachybolidae	Trigoniulus corallinus (Shelley & Lehtinen, 1999)	22.2145	114.2159	WGS84	C	China	Hong Kong Island	28 02 2020	winter	MW385012	COI
26	Arthropoda	Diplopoda	Spirobolida	Pachybolidae	Trigoniulus corallinus (Shelley & Lehtinen, 1999)	22.2166	114.2143	WGS84	C	China	Hong Kong Island	28 02 2020	winter	MW385013	COI
27	Arthropoda	Diplopoda	Spirobolida	Pachybolidae	Trigoniulus corallinus (Shelley & Lehtinen, 1999)	22.2166	114.2143	WGS84	C	China	Hong Kong Island	28 02 2020	winter	MW385014	COI
28	Arthropoda	Diplopoda	Spirobolida	Pachybolidae	Trigoniulus corallinus (Shelley & Lehtinen, 1999)	22.5017	114.1107	WGS84	H	China	Kowloon & New Territories	24 03 2020	spring	MW385015	COI
29	Arthropoda	Diplopoda	Spirobolida	Pachybolidae	Trigoniulus corallinus (Shelley & Lehtinen, 1999)	22.3162	114.185	WGS84	G	China	Kowloon & New Territories	24 03 2020	spring	MW385016	COI
30	Arthropoda	Diplopoda	Spirobolida	Pachybolidae	Trigoniulus corallinus (Shelley & Lehtinen, 1999)	22.3162	114.185	WGS84	G	China	Kowloon & New Territories	24 03 2020	spring	MW385017	COI
31	Arthropoda	Diplopoda	Spirobolida	Pachybolidae	Trigoniulus corallinus (Shelley & Lehtinen, 1999)	22.3957	113.9636	WGS84	E	China	Kowloon & New Territories	11 03 2020	spring	MW385018	COI
32	Arthropoda	Diplopoda	Spirobolida	Pachybolidae	Trigoniulus corallinus (Shelley & Lehtinen, 1999)	22.2166	114.2143	WGS84	C	China	Hong Kong Island	7 04 2020	spring	MW385019	COI
33	Arthropoda	Diplopoda	Spirobolida	Pachybolidae	Trigoniulus corallinus (Shelley & Lehtinen, 1999)	22.2166	114.2143	WGS84	C	China	Hong Kong Island	7 04 2020	spring	MW385020	COI
34	Arthropoda	Diplopoda	Spirobolida	Pachybolidae	Trigoniulus corallinus (Shelley & Lehtinen, 1999)	22.4538	114.1631	WGS84	O	China	Kowloon & New Territories	22 04 2020	spring	MW385021	COI
35	Arthropoda	Diplopoda	Spirobolida	Pachybolidae	Trigoniulus corallinus (Shelley & Lehtinen, 1999)	22.4593	114.0033	WGS84	Q	China	Kowloon & New Territories	21 04 2020	spring	MW385022	COI
36	Arthropoda	Diplopoda	Spirobolida	Pachybolidae	Trigoniulus corallinus (Shelley & Lehtinen, 1999)	22.4577	114.003	WGS84	Q	China	Kowloon & New Territories	21 04 2020	spring	MW385023	COI
37	Arthropoda	Diplopoda	Spirobolida	Spirobolellidae	Paraspirobolus lucifugus (Gervais, 1836)	22.3757	114.192	WGS84	A	China	Kowloon & New Territories	22 10 2019	autumn	MW385024	COI
38	Arthropoda	Diplopoda	Spirobolida	Spirobolellidae	Paraspirobolus lucifugus (Gervais, 1836)	22.3757	114.192	WGS84	A	China	Kowloon & New Territories	22 10 2019	autumn	MW385025	COI
39	Arthropoda	Diplopoda	Spirobolida	Spirobolellidae	Paraspirobolus lucifugus (Gervais, 1836)	22.4553	114.1663	WGS84	P	China	Kowloon & New Territories	10 10 2019	autumn	MW385026	COI
40	Arthropoda	Diplopoda	Spirobolida	Spirobolellidae	Paraspirobolus lucifugus (Gervais, 1836)	22.4553	114.1663	WGS84	P	China	Kowloon & New Territories	10 10 2019	autumn	MW385027	COI
41	Arthropoda	Diplopoda	Spirobolida	Spirobolellidae	Paraspirobolus lucifugus (Gervais, 1836)	22.4973	114.1418	WGS84	N	China	Kowloon & New Territories	16 10 2019	autumn	MW385028	COI
42	Arthropoda	Diplopoda	Spirobolida	Spirobolellidae	Paraspirobolus lucifugus (Gervais, 1836)	22.4973	114.1418	WGS84	N	China	Kowloon & New Territories	16 10 2019	autumn	MW385029	COI
43	Arthropoda	Diplopoda	Spirobolida	Spirobolellidae	Paraspirobolus lucifugus (Gervais, 1836)	22.4973	114.1418	WGS84	N	China	Kowloon & New Territories	16 10 2019	autumn	MW385030	COI
44	Arthropoda	Diplopoda	Spirobolida	Spirobolellidae	Paraspirobolus lucifugus (Gervais, 1836)	22.4973	114.1418	WGS84	N	China	Kowloon & New Territories	16 10 2019	autumn	MW385031	COI
45	Arthropoda	Diplopoda	Spirobolida	Spirobolellidae	Paraspirobolus lucifugus (Gervais, 1836)	22.4973	114.1418	WGS84	N	China	Kowloon & New Territories	16 10 2019	autumn	MW385032	COI
46	Arthropoda	Diplopoda	Spirobolida	Spirobolellidae	Paraspirobolus lucifugus (Gervais, 1836)	22.4973	114.1418	WGS84	N	China	Kowloon & New Territories	16 10 2019	autumn	MW385033	COI
47	Arthropoda	Diplopoda	Spirobolida	Spirobolellidae	Paraspirobolus lucifugus (Gervais, 1836)	22.4973	114.1418	WGS84	N	China	Kowloon & New Territories	16 10 2019	autumn	MW385034	COI
48	Arthropoda	Diplopoda	Spirobolida	Spirobolellidae	Paraspirobolus lucifugus (Gervais, 1836)	22.4973	114.1418	WGS84	N	China	Kowloon & New Territories	30 10 2019	autumn	MW385035	COI
49	Arthropoda	Diplopoda	Spirobolida	Spirobolellidae	Paraspirobolus lucifugus (Gervais, 1836)	22.4973	114.1418	WGS84	N	China	Kowloon & New Territories	30 10 2019	autumn	MW385036	COI
50	Arthropoda	Diplopoda	Spirobolida	Spirobolellidae	Paraspirobolus lucifugus (Gervais, 1836)	22.4966	114.1414	WGS84	N	China	Kowloon & New Territories	30 10 2019	autumn	MW385037	COI
51	Arthropoda	Diplopoda	Spirobolida	Spirobolellidae	Paraspirobolus lucifugus (Gervais, 1836)	22.2906	113.945	WGS84	D	China	Islands	11 10 2019	autumn	MW385038	COI
52	Arthropoda	Diplopoda	Spirobolida	Spirobolellidae	Paraspirobolus lucifugus (Gervais, 1836)	22.4966	114.1414	WGS84	N	China	Kowloon & New Territories	21 11 2019	autumn	MW385039	COI
53	Arthropoda	Diplopoda	Spirobolida	Spirobolellidae	Paraspirobolus lucifugus (Gervais, 1836)	22.4973	114.1418	WGS84	N	China	Kowloon & New Territories	28 11 2019	autumn	MW385040	COI
54	Arthropoda	Diplopoda	Spirobolida	Spirobolellidae	Paraspirobolus lucifugus (Gervais, 1836)	22.2906	113.945	WGS84	D	China	Islands	25 11 2019	autumn	MW385041	COI
55	Arthropoda	Diplopoda	Spirobolida	Spirobolellidae	Paraspirobolus lucifugus (Gervais, 1836)	22.2906	113.945	WGS84	D	China	Islands	25 11 2019	autumn	MW385042	COI
56	Arthropoda	Diplopoda	Spirobolida	Spirobolellidae	Paraspirobolus lucifugus (Gervais, 1836)	22.3961	113.9643	WGS84	E	China	Kowloon & New Territories	26 11 2019	autumn	MW385043	COI
57	Arthropoda	Diplopoda	Spirobolida	Spirobolellidae	Paraspirobolus lucifugus (Gervais, 1836)	22.3961	113.9643	WGS84	E	China	Kowloon & New Territories	26 11 2019	autumn	MW385044	COI
58	Arthropoda	Diplopoda	Spirobolida	Spirobolellidae	Paraspirobolus lucifugus (Gervais, 1836)	22.3961	113.9643	WGS84	E	China	Kowloon & New Territories	26 11 2019	autumn	MW385045	COI
59	Arthropoda	Diplopoda	Spirobolida	Spirobolellidae	Paraspirobolus lucifugus (Gervais, 1836)	22.2071	114.0374	WGS84	T	China	Islands	4 11 2019	autumn	MW385046	COI
60	Arthropoda	Diplopoda	Spirobolida	Spirobolellidae	Paraspirobolus lucifugus (Gervais, 1836)	22.3961	113.9643	WGS84	E	China	Kowloon & New Territories	26 11 2019	autumn	MW385047	COI
61	Arthropoda	Diplopoda	Julida	Julidae	Anaulaciulus tonginus (Karsch, 1881)	22.5017	114.1107	WGS84	H	China	Kowloon & New Territories	24 09 2019	autumn	MW385048	COI
62	Arthropoda	Diplopoda	Julida	Julidae	Anaulaciulus tonginus (Karsch, 1881)	22.5017	114.1107	WGS84	H	China	Kowloon & New Territories	24 09 2019	autumn	MW385049	COI
63	Arthropoda	Diplopoda	Julida	Julidae	Anaulaciulus tonginus (Karsch, 1881)	22.5017	114.1107	WGS84	H	China	Kowloon & New Territories	24 09 2019	autumn	MW385050	COI
64	Arthropoda	Diplopoda	Julida	Julidae	Anaulaciulus tonginus (Karsch, 1881)	22.3743	114.1925	WGS84	A	China	Kowloon & New Territories	22 10 2019	autumn	MW385051	COI
65	Arthropoda	Diplopoda	Julida	Julidae	Anaulaciulus tonginus (Karsch, 1881)	22.5017	114.1107	WGS84	H	China	Kowloon & New Territories	28 10 2019	autumn	MW385052	COI
66	Arthropoda	Diplopoda	Julida	Julidae	Anaulaciulus tonginus (Karsch, 1881)	22.5017	114.1107	WGS84	H	China	Kowloon & New Territories	28 10 2019	autumn	MW385053	COI
67	Arthropoda	Diplopoda	Julida	Julidae	Anaulaciulus tonginus (Karsch, 1881)	22.5017	114.1107	WGS84	H	China	Kowloon & New Territories	28 10 2019	autumn	MW385054	COI
68	Arthropoda	Diplopoda	Julida	Julidae	Anaulaciulus tonginus (Karsch, 1881)	22.3961	113.9643	WGS84	E	China	Kowloon & New Territories	22 10 2019	autumn	MW385055	COI
69	Arthropoda	Diplopoda	Julida	Julidae	Anaulaciulus tonginus (Karsch, 1881)	22.3743	114.1925	WGS84	A	China	Kowloon & New Territories	28 11 2019	autumn	MW385056	COI
70	Arthropoda	Diplopoda	Julida	Julidae	Anaulaciulus tonginus (Karsch, 1881)	22.4553	114.1663	WGS84	P	China	Kowloon & New Territories	7 11 2019	autumn	MW385057	COI
71	Arthropoda	Diplopoda	Julida	Julidae	Anaulaciulus tonginus (Karsch, 1881)	22.3743	114.1925	WGS84	A	China	Kowloon & New Territories	28 11 2019	autumn	MW385058	COI
72	Arthropoda	Diplopoda	Julida	Julidae	Anaulaciulus tonginus (Karsch, 1881)	22.3196	114.219	WGS84	K	China	Kowloon & New Territories	29 11 2019	autumn	MW385059	COI
73	Arthropoda	Diplopoda	Julida	Julidae	Anaulaciulus tonginus (Karsch, 1881)	22.3196	114.219	WGS84	K	China	Kowloon & New Territories	29 11 2019	autumn	MW385060	COI
74	Arthropoda	Diplopoda	Julida	Julidae	Anaulaciulus tonginus (Karsch, 1881)	22.4553	114.1663	WGS84	P	China	Kowloon & New Territories	21 11 2019	autumn	MW385061	COI
75	Arthropoda	Diplopoda	Julida	Julidae	Anaulaciulus tonginus (Karsch, 1881)	22.2868	114.2046	WGS84	M	China	Hong Kong Island	25 11 2019	autumn	MW385062	COI
76	Arthropoda	Diplopoda	Julida	Julidae	Anaulaciulus tonginus (Karsch, 1881)	22.4591	114.0033	WGS84	Q	China	Kowloon & New Territories	6 11 2019	autumn	MW385063	COI
77	Arthropoda	Diplopoda	Julida	Julidae	Anaulaciulus tonginus (Karsch, 1881)	22.4577	114.003	WGS84	Q	China	Kowloon & New Territories	22 11 2019	autumn	MW385064	COI
78	Arthropoda	Diplopoda	Julida	Julidae	Anaulaciulus tonginus (Karsch, 1881)	22.4577	114.003	WGS84	Q	China	Kowloon & New Territories	22 11 2019	autumn	MW385065	COI
79	Arthropoda	Diplopoda	Julida	Julidae	Anaulaciulus tonginus (Karsch, 1881)	22.2906	113.945	WGS84	D	China	Islands	25 11 2019	autumn	MW385066	COI
80	Arthropoda	Diplopoda	Julida	Julidae	Anaulaciulus tonginus (Karsch, 1881)	22.4538	114.1631	WGS84	O	China	Kowloon & New Territories	22 11 2019	autumn	MW385067	COI
81	Arthropoda	Diplopoda	Julida	Julidae	Anaulaciulus tonginus (Karsch, 1881)	22.3961	113.9643	WGS84	E	China	Kowloon & New Territories	26 11 2019	autumn	MW385068	COI
82	Arthropoda	Diplopoda	Julida	Julidae	Anaulaciulus tonginus (Karsch, 1881)	22.3961	113.9643	WGS84	E	China	Kowloon & New Territories	26 11 2019	autumn	MW385069	COI
83	Arthropoda	Diplopoda	Julida	Julidae	Anaulaciulus tonginus (Karsch, 1881)	22.3961	113.9643	WGS84	E	China	Kowloon & New Territories	26 11 2019	autumn	MW385070	COI
84	Arthropoda	Diplopoda	Julida	Julidae	Anaulaciulus tonginus (Karsch, 1881)	22.3957	113.9636	WGS84	E	China	Kowloon & New Territories	28 11 2019	autumn	MW385071	COI
85	Arthropoda	Diplopoda	Julida	Julidae	Anaulaciulus tonginus (Karsch, 1881)	22.3957	113.9636	WGS84	E	China	Kowloon & New Territories	28 11 2019	autumn	MW385072	COI
86	Arthropoda	Diplopoda	Julida	Julidae	Anaulaciulus tonginus (Karsch, 1881)	22.3957	113.9636	WGS84	E	China	Kowloon & New Territories	28 11 2019	autumn	MW385073	COI
87	Arthropoda	Diplopoda	Julida	Julidae	Anaulaciulus tonginus (Karsch, 1881)	22.4173	114.2068	WGS84	U	China	Kowloon & New Territories	29 11 2019	autumn	MW385074	COI
88	Arthropoda	Diplopoda	Julida	Julidae	Anaulaciulus tonginus (Karsch, 1881)	22.4966	114.1414	WGS84	N	China	Kowloon & New Territories	12 12 2019	winter	MW385075	COI
89	Arthropoda	Diplopoda	Julida	Julidae	Anaulaciulus tonginus (Karsch, 1881)	22.4966	114.1414	WGS84	N	China	Kowloon & New Territories	12 12 2019	winter	MW385076	COI
90	Arthropoda	Diplopoda	Julida	Julidae	Anaulaciulus tonginus (Karsch, 1881)	22.5017	114.1107	WGS84	H	China	Kowloon & New Territories	10 12 2019	winter	MW385077	COI
91	Arthropoda	Diplopoda	Julida	Julidae	Anaulaciulus tonginus (Karsch, 1881)	22.3743	114.1925	WGS84	A	China	Kowloon & New Territories	20 12 2019	winter	MW385078	COI
92	Arthropoda	Diplopoda	Julida	Julidae	Anaulaciulus tonginus (Karsch, 1881)	22.3044	114.2501	WGS84	I	China	Kowloon & New Territories	2 12 2019	winter	MW385079	COI
93	Arthropoda	Diplopoda	Julida	Julidae	Anaulaciulus tonginus (Karsch, 1881)	22.3196	114.219	WGS84	K	China	Kowloon & New Territories	20 12 2019	winter	MW385080	COI
94	Arthropoda	Diplopoda	Julida	Julidae	Anaulaciulus tonginus (Karsch, 1881)	22.3196	114.219	WGS84	K	China	Kowloon & New Territories	20 12 2019	winter	MW385081	COI
95	Arthropoda	Diplopoda	Julida	Julidae	Anaulaciulus tonginus (Karsch, 1881)	22.3367	114.1954	WGS84	F	China	Kowloon & New Territories	20 12 2019	winter	MW385082	COI
96	Arthropoda	Diplopoda	Julida	Julidae	Anaulaciulus tonginus (Karsch, 1881)	22.2166	114.2143	WGS84	C	China	Hong Kong Island	6 12 2019	winter	MW385083	COI
97	Arthropoda	Diplopoda	Julida	Julidae	Anaulaciulus tonginus (Karsch, 1881)	22.2166	114.2143	WGS84	C	China	Hong Kong Island	6 12 2019	winter	MW385084	COI
98	Arthropoda	Diplopoda	Julida	Julidae	Anaulaciulus tonginus (Karsch, 1881)	22.2166	114.2143	WGS84	C	China	Hong Kong Island	17 12 2019	winter	MW385085	COI
99	Arthropoda	Diplopoda	Julida	Julidae	Anaulaciulus tonginus (Karsch, 1881)	22.4538	114.1631	WGS84	O	China	Kowloon & New Territories	19 12 2019	winter	MW385086	COI
100	Arthropoda	Diplopoda	Julida	Julidae	Anaulaciulus tonginus (Karsch, 1881)	22.4591	114.0033	WGS84	Q	China	Kowloon & New Territories	12 12 2019	winter	MW385087	COI
101	Arthropoda	Diplopoda	Julida	Julidae	Anaulaciulus tonginus (Karsch, 1881)	22.3206	114.186	WGS84	G	China	Kowloon & New Territories	23 12 2019	winter	MW385088	COI
102	Arthropoda	Diplopoda	Julida	Julidae	Anaulaciulus tonginus (Karsch, 1881)	22.4577	114.003	WGS84	Q	China	Kowloon & New Territories	18 12 2019	winter	MW385089	COI
103	Arthropoda	Diplopoda	Julida	Julidae	Anaulaciulus tonginus (Karsch, 1881)	22.3206	114.186	WGS84	G	China	Kowloon & New Territories	23 12 2019	winter	MW385090	COI
104	Arthropoda	Diplopoda	Julida	Julidae	Anaulaciulus tonginus (Karsch, 1881)	22.3162	114.185	WGS84	G	China	Kowloon & New Territories	23 12 2019	winter	MW385091	COI
105	Arthropoda	Diplopoda	Julida	Julidae	Anaulaciulus tonginus (Karsch, 1881)	22.2906	113.945	WGS84	D	China	Islands	18 12 2019	winter	MW385092	COI
106	Arthropoda	Diplopoda	Julida	Julidae	Anaulaciulus tonginus (Karsch, 1881)	22.3961	113.9643	WGS84	E	China	Kowloon & New Territories	30 12 2019	winter	MW385093	COI
107	Arthropoda	Diplopoda	Julida	Julidae	Anaulaciulus tonginus (Karsch, 1881)	22.2052	114.0372	WGS84	T	China	Islands	31 12 2019	winter	MW385094	COI
108	Arthropoda	Diplopoda	Julida	Julidae	Anaulaciulus tonginus (Karsch, 1881)	22.3957	113.9636	WGS84	E	China	Kowloon & New Territories	30 12 2019	winter	MW385095	COI
109	Arthropoda	Diplopoda	Julida	Julidae	Anaulaciulus tonginus (Karsch, 1881)	22.4173	114.2068	WGS84	U	China	Kowloon & New Territories	18 12 2019	winter	MW385096	COI
110	Arthropoda	Diplopoda	Julida	Julidae	Anaulaciulus tonginus (Karsch, 1881)	22.4173	114.2068	WGS84	U	China	Kowloon & New Territories	18 12 2019	winter	MW385097	COI
111	Arthropoda	Diplopoda	Julida	Julidae	Anaulaciulus tonginus (Karsch, 1881)	22.4173	114.2068	WGS84	U	China	Kowloon & New Territories	30 12 2019	winter	MW385098	COI
112	Arthropoda	Diplopoda	Julida	Julidae	Anaulaciulus tonginus (Karsch, 1881)	22.4173	114.2068	WGS84	U	China	Kowloon & New Territories	30 12 2019	winter	MW385099	COI
113	Arthropoda	Diplopoda	Julida	Julidae	Anaulaciulus tonginus (Karsch, 1881)	22.4553	114.1663	WGS84	P	China	Kowloon & New Territories	14 01 2020	winter	MW385100	COI
114	Arthropoda	Diplopoda	Julida	Julidae	Anaulaciulus tonginus (Karsch, 1881)	22.4553	114.1663	WGS84	P	China	Kowloon & New Territories	14 01 2020	winter	MW385101	COI
115	Arthropoda	Diplopoda	Julida	Julidae	Anaulaciulus tonginus (Karsch, 1881)	22.4553	114.1663	WGS84	P	China	Kowloon & New Territories	14 01 2020	winter	MW385102	COI
116	Arthropoda	Diplopoda	Julida	Julidae	Anaulaciulus tonginus (Karsch, 1881)	22.4553	114.1663	WGS84	P	China	Kowloon & New Territories	14 01 2020	winter	MW385103	COI
117	Arthropoda	Diplopoda	Julida	Julidae	Anaulaciulus tonginus (Karsch, 1881)	22.4553	114.1663	WGS84	P	China	Kowloon & New Territories	14 01 2020	winter	MW385104	COI
118	Arthropoda	Diplopoda	Julida	Julidae	Anaulaciulus tonginus (Karsch, 1881)	22.4545	114.1662	WGS84	P	China	Kowloon & New Territories	14 01 2020	winter	MW385105	COI
119	Arthropoda	Diplopoda	Julida	Julidae	Anaulaciulus tonginus (Karsch, 1881)	22.4545	114.1662	WGS84	P	China	Kowloon & New Territories	14 01 2020	winter	MW385106	COI
120	Arthropoda	Diplopoda	Julida	Julidae	Anaulaciulus tonginus (Karsch, 1881)	22.4545	114.1662	WGS84	P	China	Kowloon & New Territories	14 01 2020	winter	MW385107	COI
121	Arthropoda	Diplopoda	Julida	Julidae	Anaulaciulus tonginus (Karsch, 1881)	22.4577	114.003	WGS84	Q	China	Kowloon & New Territories	23 01 2020	winter	MW385108	COI
122	Arthropoda	Diplopoda	Julida	Julidae	Anaulaciulus tonginus (Karsch, 1881)	22.3957	113.9636	WGS84	E	China	Kowloon & New Territories	21 01 2020	winter	MW385109	COI
123	Arthropoda	Diplopoda	Julida	Julidae	Anaulaciulus tonginus (Karsch, 1881)	22.3162	114.185	WGS84	G	China	Kowloon & New Territories	31 01 2020	winter	MW385110	COI
124	Arthropoda	Diplopoda	Julida	Julidae	Anaulaciulus tonginus (Karsch, 1881)	22.3162	114.185	WGS84	G	China	Kowloon & New Territories	31 01 2020	winter	MW385111	COI
125	Arthropoda	Diplopoda	Julida	Julidae	Anaulaciulus tonginus (Karsch, 1881)	22.3162	114.185	WGS84	G	China	Kowloon & New Territories	31 01 2020	winter	MW385112	COI
126	Arthropoda	Diplopoda	Julida	Julidae	Anaulaciulus tonginus (Karsch, 1881)	22.4966	114.1414	WGS84	N	China	Kowloon & New Territories	20 01 2020	winter	MW385113	COI
127	Arthropoda	Diplopoda	Julida	Julidae	Anaulaciulus tonginus (Karsch, 1881)	22.4173	114.2068	WGS84	U	China	Kowloon & New Territories	14 01 2020	winter	MW385114	COI
128	Arthropoda	Diplopoda	Julida	Julidae	Anaulaciulus tonginus (Karsch, 1881)	22.287	114.2044	WGS84	M	China	Hong Kong Island	6 02 2020	winter	MW385115	COI
129	Arthropoda	Diplopoda	Julida	Julidae	Anaulaciulus tonginus (Karsch, 1881)	22.2868	114.2046	WGS84	M	China	Hong Kong Island	6 02 2020	winter	MW385116	COI
130	Arthropoda	Diplopoda	Julida	Julidae	Anaulaciulus tonginus (Karsch, 1881)	22.4553	114.1663	WGS84	P	China	Kowloon & New Territories	21 02 2020	winter	MW385117	COI
131	Arthropoda	Diplopoda	Julida	Julidae	Anaulaciulus tonginus (Karsch, 1881)	22.2906	113.945	WGS84	D	China	Islands	20 02 2020	winter	MW385118	COI
132	Arthropoda	Diplopoda	Julida	Julidae	Anaulaciulus tonginus (Karsch, 1881)	22.4591	114.0033	WGS84	Q	China	Kowloon & New Territories	20 02 2020	winter	MW385119	COI
133	Arthropoda	Diplopoda	Julida	Julidae	Anaulaciulus tonginus (Karsch, 1881)	22.4577	114.003	WGS84	Q	China	Kowloon & New Territories	20 02 2020	winter	MW385120	COI
134	Arthropoda	Diplopoda	Julida	Julidae	Anaulaciulus tonginus (Karsch, 1881)	22.4577	114.003	WGS84	Q	China	Kowloon & New Territories	20 02 2020	winter	MW385121	COI
135	Arthropoda	Diplopoda	Julida	Julidae	Anaulaciulus tonginus (Karsch, 1881)	22.4577	114.003	WGS84	Q	China	Kowloon & New Territories	20 02 2020	winter	MW385122	COI
136	Arthropoda	Diplopoda	Julida	Julidae	Anaulaciulus tonginus (Karsch, 1881)	22.4577	114.003	WGS84	Q	China	Kowloon & New Territories	20 02 2020	winter	MW385123	COI
137	Arthropoda	Diplopoda	Julida	Julidae	Anaulaciulus tonginus (Karsch, 1881)	22.4538	114.1631	WGS84	O	China	Kowloon & New Territories	21 02 2020	winter	MW385124	COI
138	Arthropoda	Diplopoda	Julida	Julidae	Anaulaciulus tonginus (Karsch, 1881)	22.3044	114.2501	WGS84	I	China	Kowloon & New Territories	6 02 2020	winter	MW385125	COI
139	Arthropoda	Diplopoda	Julida	Julidae	Anaulaciulus tonginus (Karsch, 1881)	22.3957	113.9636	WGS84	E	China	Kowloon & New Territories	20 02 2020	winter	MW385126	COI
140	Arthropoda	Diplopoda	Julida	Julidae	Anaulaciulus tonginus (Karsch, 1881)	22.2145	114.2159	WGS84	C	China	Hong Kong Island	28 02 2020	winter	MW385127	COI
141	Arthropoda	Diplopoda	Julida	Julidae	Anaulaciulus tonginus (Karsch, 1881)	22.4173	114.2068	WGS84	U	China	Kowloon & New Territories	4 02 2020	winter	MW385128	COI
142	Arthropoda	Diplopoda	Julida	Julidae	Anaulaciulus tonginus (Karsch, 1881)	22.2166	114.2143	WGS84	C	China	Hong Kong Island	28 02 2020	winter	MW385129	COI
143	Arthropoda	Diplopoda	Julida	Julidae	Anaulaciulus tonginus (Karsch, 1881)	22.4173	114.2068	WGS84	U	China	Kowloon & New Territories	19 02 2020	winter	MW385130	COI
144	Arthropoda	Diplopoda	Julida	Julidae	Anaulaciulus tonginus (Karsch, 1881)	22.4173	114.2068	WGS84	U	China	Kowloon & New Territories	19 02 2020	winter	MW385131	COI
145	Arthropoda	Diplopoda	Julida	Julidae	Anaulaciulus tonginus (Karsch, 1881)	22.3044	114.2501	WGS84	I	China	Kowloon & New Territories	10 03 2020	spring	MW385132	COI
146	Arthropoda	Diplopoda	Julida	Julidae	Anaulaciulus tonginus (Karsch, 1881)	22.4545	114.1662	WGS84	P	China	Kowloon & New Territories	12 03 2020	spring	MW385133	COI
147	Arthropoda	Diplopoda	Julida	Julidae	Anaulaciulus tonginus (Karsch, 1881)	22.3196	114.219	WGS84	K	China	Kowloon & New Territories	24 03 2020	spring	MW385134	COI
148	Arthropoda	Diplopoda	Julida	Julidae	Anaulaciulus tonginus (Karsch, 1881)	22.4553	114.1663	WGS84	P	China	Kowloon & New Territories	12 03 2020	spring	MW385135	COI
149	Arthropoda	Diplopoda	Julida	Julidae	Anaulaciulus tonginus (Karsch, 1881)	22.4553	114.1663	WGS84	P	China	Kowloon & New Territories	12 03 2020	spring	MW385136	COI
150	Arthropoda	Diplopoda	Julida	Julidae	Anaulaciulus tonginus (Karsch, 1881)	22.4538	114.1631	WGS84	O	China	Kowloon & New Territories	12 03 2020	spring	MW385137	COI
151	Arthropoda	Diplopoda	Julida	Julidae	Anaulaciulus tonginus (Karsch, 1881)	22.4538	114.1631	WGS84	O	China	Kowloon & New Territories	12 03 2020	spring	MW385138	COI
152	Arthropoda	Diplopoda	Julida	Julidae	Anaulaciulus tonginus (Karsch, 1881)	22.501	114.1106	WGS84	H	China	Kowloon & New Territories	24 03 2020	spring	MW385139	COI
153	Arthropoda	Diplopoda	Julida	Julidae	Anaulaciulus tonginus (Karsch, 1881)	22.4538	114.1631	WGS84	O	China	Kowloon & New Territories	26 03 2020	spring	MW385140	COI
154	Arthropoda	Diplopoda	Julida	Julidae	Anaulaciulus tonginus (Karsch, 1881)	22.4593	114.0033	WGS84	Q	China	Kowloon & New Territories	11 03 2020	spring	MW385141	COI
155	Arthropoda	Diplopoda	Julida	Julidae	Anaulaciulus tonginus (Karsch, 1881)	22.4593	114.0033	WGS84	Q	China	Kowloon & New Territories	11 03 2020	spring	MW385142	COI
156	Arthropoda	Diplopoda	Julida	Julidae	Anaulaciulus tonginus (Karsch, 1881)	22.4577	114.003	WGS84	Q	China	Kowloon & New Territories	11 03 2020	spring	MW385143	COI
157	Arthropoda	Diplopoda	Julida	Julidae	Anaulaciulus tonginus (Karsch, 1881)	22.4577	114.003	WGS84	Q	China	Kowloon & New Territories	11 03 2020	spring	MW385144	COI
158	Arthropoda	Diplopoda	Julida	Julidae	Anaulaciulus tonginus (Karsch, 1881)	22.287	114.2044	WGS84	M	China	Hong Kong Island	25 03 2020	spring	MW385145	COI
159	Arthropoda	Diplopoda	Julida	Julidae	Anaulaciulus tonginus (Karsch, 1881)	22.2868	114.2046	WGS84	M	China	Hong Kong Island	25 03 2020	spring	MW385146	COI
160	Arthropoda	Diplopoda	Julida	Julidae	Anaulaciulus tonginus (Karsch, 1881)	22.3757	114.192	WGS84	A	China	Kowloon & New Territories	12 03 2020	spring	MW385147	COI
161	Arthropoda	Diplopoda	Julida	Julidae	Anaulaciulus tonginus (Karsch, 1881)	22.3743	114.1925	WGS84	A	China	Kowloon & New Territories	12 03 2020	spring	MW385148	COI
162	Arthropoda	Diplopoda	Julida	Julidae	Anaulaciulus tonginus (Karsch, 1881)	22.3743	114.1925	WGS84	A	China	Kowloon & New Territories	12 03 2020	spring	MW385149	COI
163	Arthropoda	Diplopoda	Julida	Julidae	Anaulaciulus tonginus (Karsch, 1881)	22.3743	114.1925	WGS84	A	China	Kowloon & New Territories	12 03 2020	spring	MW385150	COI
164	Arthropoda	Diplopoda	Julida	Julidae	Anaulaciulus tonginus (Karsch, 1881)	22.4577	114.003	WGS84	Q	China	Kowloon & New Territories	11 03 2020	spring	MW385151	COI
165	Arthropoda	Diplopoda	Julida	Julidae	Anaulaciulus tonginus (Karsch, 1881)	22.3757	114.192	WGS84	A	China	Kowloon & New Territories	26 03 2020	spring	MW385152	COI
166	Arthropoda	Diplopoda	Julida	Julidae	Anaulaciulus tonginus (Karsch, 1881)	22.3743	114.1925	WGS84	A	China	Kowloon & New Territories	26 03 2020	spring	MW385153	COI
167	Arthropoda	Diplopoda	Julida	Julidae	Anaulaciulus tonginus (Karsch, 1881)	22.2906	113.945	WGS84	D	China	Islands	11 03 2020	spring	MW385154	COI
168	Arthropoda	Diplopoda	Julida	Julidae	Anaulaciulus tonginus (Karsch, 1881)	22.2904	113.947	WGS84	D	China	Islands	11 03 2020	spring	MW385155	COI
169	Arthropoda	Diplopoda	Julida	Julidae	Anaulaciulus tonginus (Karsch, 1881)	22.4423	114.0343	WGS84	S	China	Kowloon & New Territories	11 03 2020	spring	MW385156	COI
170	Arthropoda	Diplopoda	Julida	Julidae	Anaulaciulus tonginus (Karsch, 1881)	22.3961	113.9643	WGS84	E	China	Kowloon & New Territories	11 03 2020	spring	MW385157	COI
171	Arthropoda	Diplopoda	Julida	Julidae	Anaulaciulus tonginus (Karsch, 1881)	22.3961	113.9643	WGS84	E	China	Kowloon & New Territories	11 03 2020	spring	MW385158	COI
172	Arthropoda	Diplopoda	Julida	Julidae	Anaulaciulus tonginus (Karsch, 1881)	22.3961	113.9643	WGS84	E	China	Kowloon & New Territories	11 03 2020	spring	MW385159	COI
173	Arthropoda	Diplopoda	Julida	Julidae	Anaulaciulus tonginus (Karsch, 1881)	22.3961	113.9643	WGS84	E	China	Kowloon & New Territories	11 03 2020	spring	MW385160	COI
174	Arthropoda	Diplopoda	Julida	Julidae	Anaulaciulus tonginus (Karsch, 1881)	22.4173	114.2068	WGS84	U	China	Kowloon & New Territories	2 03 2020	spring	MW385161	COI
175	Arthropoda	Diplopoda	Julida	Julidae	Anaulaciulus tonginus (Karsch, 1881)	22.3957	113.9636	WGS84	E	China	Kowloon & New Territories	11 03 2020	spring	MW385162	COI
176	Arthropoda	Diplopoda	Julida	Julidae	Anaulaciulus tonginus (Karsch, 1881)	22.3957	113.9636	WGS84	E	China	Kowloon & New Territories	11 03 2020	spring	MW385163	COI
177	Arthropoda	Diplopoda	Julida	Julidae	Anaulaciulus tonginus (Karsch, 1881)	22.4173	114.2068	WGS84	U	China	Kowloon & New Territories	23 03 2020	spring	MW385164	COI
178	Arthropoda	Diplopoda	Julida	Julidae	Anaulaciulus tonginus (Karsch, 1881)	22.3757	114.192	WGS84	A	China	Kowloon & New Territories	23 04 2020	spring	MW385165	COI
179	Arthropoda	Diplopoda	Julida	Julidae	Anaulaciulus tonginus (Karsch, 1881)	22.3743	114.1925	WGS84	A	China	Kowloon & New Territories	23 04 2020	spring	MW385166	COI
180	Arthropoda	Diplopoda	Julida	Julidae	Anaulaciulus tonginus (Karsch, 1881)	22.3743	114.1925	WGS84	A	China	Kowloon & New Territories	23 04 2020	spring	MW385167	COI
181	Arthropoda	Diplopoda	Julida	Julidae	Anaulaciulus tonginus (Karsch, 1881)	22.2145	114.2159	WGS84	C	China	Hong Kong Island	7 04 2020	spring	MW385168	COI
182	Arthropoda	Diplopoda	Julida	Julidae	Anaulaciulus tonginus (Karsch, 1881)	22.2145	114.2159	WGS84	C	China	Hong Kong Island	7 04 2020	spring	MW385169	COI
183	Arthropoda	Diplopoda	Julida	Julidae	Anaulaciulus tonginus (Karsch, 1881)	22.2906	113.945	WGS84	D	China	Islands	22 04 2020	spring	MW385170	COI
184	Arthropoda	Diplopoda	Julida	Julidae	Anaulaciulus tonginus (Karsch, 1881)	22.2904	113.947	WGS84	D	China	Islands	22 04 2020	spring	MW385171	COI
185	Arthropoda	Diplopoda	Julida	Julidae	Anaulaciulus tonginus (Karsch, 1881)	22.3957	113.9636	WGS84	E	China	Kowloon & New Territories	28 04 2020	spring	MW385172	COI
186	Arthropoda	Diplopoda	Julida	Julidae	Anaulaciulus tonginus (Karsch, 1881)	22.3196	114.219	WGS84	K	China	Kowloon & New Territories	20 04 2020	spring	MW385173	COI
187	Arthropoda	Diplopoda	Julida	Julidae	Anaulaciulus tonginus (Karsch, 1881)	22.4556	114.1671	WGS84	P	China	Kowloon & New Territories	22 04 2020	spring	MW385174	COI
188	Arthropoda	Diplopoda	Julida	Julidae	Anaulaciulus tonginus (Karsch, 1881)	22.4556	114.1671	WGS84	P	China	Kowloon & New Territories	22 04 2020	spring	MW385175	COI
189	Arthropoda	Diplopoda	Julida	Julidae	Anaulaciulus tonginus (Karsch, 1881)	22.4553	114.1663	WGS84	P	China	Kowloon & New Territories	22 04 2020	spring	MW385176	COI
190	Arthropoda	Diplopoda	Julida	Julidae	Anaulaciulus tonginus (Karsch, 1881)	22.4593	114.0033	WGS84	Q	China	Kowloon & New Territories	21 04 2020	spring	MW385177	COI
191	Arthropoda	Diplopoda	Julida	Julidae	Anaulaciulus tonginus (Karsch, 1881)	22.4577	114.003	WGS84	Q	China	Kowloon & New Territories	21 04 2020	spring	MW385178	COI
192	Arthropoda	Diplopoda	Julida	Julidae	Anaulaciulus tonginus (Karsch, 1881)	22.2052	114.0372	WGS84	T	China	Islands	3 04 2020	spring	MW385179	COI
193	Arthropoda	Diplopoda	Polydesmida	Paradoxosomatidae	Helicorthomorpha holstii (Pocock, 1895)	22.2166	114.2143	WGS84	C	China	Hong Kong Island	7 04 2020	spring	MW385180	COI
194	Arthropoda	Diplopoda	Polydesmida	Paradoxosomatidae	Helicorthomorpha holstii (Pocock, 1895)	22.2166	114.2143	WGS84	C	China	Hong Kong Island	7 04 2020	spring	MW385181	COI
195	Arthropoda	Diplopoda	Spirostreptida	Cambalopsidae	Glyphiulus granulatus (Gervais, 1847)	22.2869	114.138	WGS84	B	China	Hong Kong Island	27 09 2019	autumn	MW385182	COI
196	Arthropoda	Diplopoda	Spirostreptida	Cambalopsidae	Glyphiulus granulatus (Gervais, 1847)	22.2869	114.138	WGS84	B	China	Hong Kong Island	27 09 2019	autumn	MW385183	COI
197	Arthropoda	Diplopoda	Spirostreptida	Cambalopsidae	Glyphiulus granulatus (Gervais, 1847)	22.2869	114.138	WGS84	B	China	Hong Kong Island	6 02 2020	winter	MW385184	COI
198	Arthropoda	Diplopoda	Spirobolida	Pachybolidae	Leptogoniulus sorornus (Butler, 1876)	22.3053	114.235	WGS84	J	China	Kowloon & New Territories	29 11 2019	autumn	MW385185	COI
199	Arthropoda	Diplopoda	Spirobolida	Pachybolidae	Leptogoniulus sorornus (Butler, 1876)	22.3957	113.9636	WGS84	E	China	Kowloon & New Territories	11 03 2020	spring	MW385186	COI
200	Arthropoda	Diplopoda	Polydesmida	Paradoxosomatidae	Orthomorpha coarctata (Saussure, 1860)	22.2869	114.138	WGS84	B	China	Hong Kong Island	27 09 2019	autumn	MW385187	COI
201	Arthropoda	Diplopoda	Polydesmida	Paradoxosomatidae	Orthomorpha coarctata (Saussure, 1860)	22.4593	114.0033	WGS84	Q	China	Kowloon & New Territories	6 11 2019	autumn	MW385188	COI
202	Arthropoda	Diplopoda	Polydesmida	Paradoxosomatidae	Orthomorpha coarctata (Saussure, 1860)	22.2869	114.138	WGS84	B	China	Hong Kong Island	6 02 2020	winter	MW385189	COI
203	Arthropoda	Diplopoda	Polydesmida	Paradoxosomatidae	Orthomorpha coarctata (Saussure, 1860)	22.3196	114.219	WGS84	K	China	Kowloon & New Territories	24 03 2020	spring	MW385190	COI
204	Arthropoda	Diplopoda	Polydesmida	Paradoxosomatidae	Orthomorpha coarctata (Saussure, 1860)	22.2869	114.138	WGS84	B	China	Hong Kong Island	25 03 2020	spring	MW385191	COI
205	Arthropoda	Diplopoda	Polydesmida	Paradoxosomatidae	Orthomorpha coarctata (Saussure, 1860)	22.4593	114.0033	WGS84	Q	China	Kowloon & New Territories	21 04 2020	spring	MW385192	COI
206	Arthropoda	Diplopoda	Polydesmida	Paradoxosomatidae	Orthomorpha coarctata (Saussure, 1860)	22.4973	114.1418	WGS84	N	China	Kowloon & New Territories	10 06 2020	summer	MW385193	COI
207	Arthropoda	Diplopoda	Polydesmida	Paradoxosomatidae	Orthomorpha coarctata (Saussure, 1860)	22.2904	113.947	WGS84	D	China	Islands	21 07 2020	summer	MW385194	COI
208	Arthropoda	Diplopoda	Polydesmida	Paradoxosomatidae	Oxidus gracilis (Koch, 1847)	22.2166	114.2143	WGS84	C	China	Hong Kong Island	28 02 2020	winter	MW385195	COI
209	Arthropoda	Diplopoda	Polydesmida	Paradoxosomatidae	Oxidus gracilis (Koch, 1847)	22.2166	114.2143	WGS84	C	China	Hong Kong Island	28 02 2020	winter	MW385196	COI
210	Arthropoda	Diplopoda	Polydesmida	Paradoxosomatidae	Oxidus gracilis (Koch, 1847)	22.501	114.1106	WGS84	H	China	Kowloon & New Territories	24 03 2020	spring	MW385197	COI
211	Arthropoda	Diplopoda	Polydesmida	Paradoxosomatidae	Oxidus gracilis (Koch, 1847)	22.2868	114.2046	WGS84	M	China	Hong Kong Island	25 03 2020	spring	MW385198	COI
212	Arthropoda	Diplopoda	Polydesmida	Paradoxosomatidae	Oxidus gracilis (Koch, 1847)	22.2868	114.2046	WGS84	M	China	Hong Kong Island	25 03 2020	spring	MW385199	COI
213	Arthropoda	Diplopoda	Polydesmida	Paradoxosomatidae	Oxidus gracilis (Koch, 1847)	22.2868	114.2046	WGS84	M	China	Hong Kong Island	25 03 2020	spring	MW385200	COI
214	Arthropoda	Diplopoda	Polydesmida	Paradoxosomatidae	Oxidus gracilis (Koch, 1847)	22.2868	114.2046	WGS84	M	China	Hong Kong Island	25 03 2020	spring	MW385201	COI
215	Arthropoda	Diplopoda	Polydesmida	Paradoxosomatidae	Oxidus gracilis (Koch, 1847)	22.2906	113.945	WGS84	D	China	Islands	22 04 2020	spring	MW385202	COI
216	Arthropoda	Diplopoda	Polydesmida	Paradoxosomatidae	Oxidus gracilis (Koch, 1847)	22.2906	113.945	WGS84	D	China	Islands	22 04 2020	spring	MW385203	COI
217	Arthropoda	Diplopoda	Polydesmida	Paradoxosomatidae	Oxidus gracilis (Koch, 1847)	22.2904	113.947	WGS84	D	China	Islands	22 04 2020	spring	MW385204	COI
218	Arthropoda	Diplopoda	Polydesmida	Paradoxosomatidae	Oxidus gracilis (Koch, 1847)	22.2904	113.947	WGS84	D	China	Islands	22 04 2020	spring	MW385205	COI
219	Arthropoda	Diplopoda	Polydesmida	Paradoxosomatidae	Oxidus gracilis (Koch, 1847)	22.2904	113.947	WGS84	D	China	Islands	22 04 2020	spring	MW385206	COI
220	Arthropoda	Diplopoda	Polydesmida	Paradoxosomatidae	Oxidus gracilis (Koch, 1847)	22.4545	114.1662	WGS84	P	China	Kowloon & New Territories	20 05 2020	spring	MW385207	COI
221	Arthropoda	Diplopoda	Polydesmida	Paradoxosomatidae	Oxidus gracilis (Koch, 1847)	22.4173	114.2068	WGS84	U	China	Kowloon & New Territories	15 05 2020	spring	MW385208	COI
222	Arthropoda	Diplopoda	Polydesmida	Paradoxosomatidae	Oxidus gracilis (Koch, 1847)	22.4173	114.2068	WGS84	U	China	Kowloon & New Territories	15 05 2020	spring	MW385209	COI
223	Arthropoda	Diplopoda	Polydesmida	Paradoxosomatidae	Oxidus gracilis (Koch, 1847)	22.4173	114.2068	WGS84	U	China	Kowloon & New Territories	15 05 2020	spring	MW385210	COI
224	Arthropoda	Diplopoda	Polydesmida	Paradoxosomatidae	Oxidus gracilis (Koch, 1847)	22.2904	113.947	WGS84	D	China	Islands	24 06 2020	summer	MW385211	COI
225	Arthropoda	Diplopoda	Polydesmida	Paradoxosomatidae	Oxidus gracilis (Koch, 1847)	22.2906	113.945	WGS84	D	China	Islands	25 08 2020	summer	MW385212	COI
226	Arthropoda	Diplopoda	Polydesmida	Paradoxosomatidae	Oxidus gracilis (Koch, 1847)	22.2906	113.945	WGS84	D	China	Islands	25 08 2020	summer	MW385213	COI
227	Arthropoda	Diplopoda	Polyxenida	Lophoproctidae	Alloproctoides remyi (Short, 2015)	22.4423	114.0343	WGS84	S	China	Kowloon & New Territories	18 10 2019	autumn	MW385214	COI
228	Arthropoda	Diplopoda	Polyxenida	Lophoproctidae	Alloproctoides remyi (Short, 2015)	22.2071	114.0374	WGS84	T	China	Islands	4 11 2019	autumn	MW385215	COI
229	Arthropoda	Diplopoda	Polyxenida	Lophoproctidae	Alloproctoides remyi (Short, 2015)	22.4423	114.0343	WGS84	S	China	Kowloon & New Territories	20 12 2019	winter	MW385216	COI
230	Arthropoda	Diplopoda	Polyxenida	Lophoproctidae	Alloproctoides remyi (Short, 2015)	22.4423	114.0343	WGS84	S	China	Kowloon & New Territories	20 02 2020	winter	MW385217	COI
231	Arthropoda	Diplopoda	Polyxenida	Lophoproctidae	Alloproctoides remyi (Short, 2015)	22.4423	114.0343	WGS84	S	China	Kowloon & New Territories	20 02 2020	winter	MW385218	COI
232	Arthropoda	Diplopoda	Polyxenida	Lophoproctidae	Alloproctoides remyi (Short, 2015)	22.4423	114.0343	WGS84	S	China	Kowloon & New Territories	11 03 2020	spring	MW385219	COI
233	Arthropoda	Diplopoda	Polyxenida	Lophoproctidae	Alloproctoides remyi (Short, 2015)	22.2906	113.945	WGS84	D	China	Islands	22 04 2020	spring	MW385222	COI
234	Arthropoda	Diplopoda	Polyxenida	Polyxenidae	Monographis queenslandica (Lucas, 1840)	22.444	114.0234	WGS84	R	China	Kowloon & New Territories	11 03 2020	spring	MW385223	COI
235	Arthropoda	Diplopoda	Polyxenida	Polyxenidae	Monographis queenslandica (Lucas, 1840)	22.444	114.0234	WGS84	R	China	Kowloon & New Territories	11 03 2020	spring	MW385224	COI
236	Arthropoda	Diplopoda	Polydesmida	Pyrgodesmidae	Cryptocorypha sp. (Attems, 1907)	22.4173	114.2068	WGS84	U	China	Kowloon & New Territories	30 12 2019	winter	MW385225	COI
237	Arthropoda	Diplopoda	Polydesmida	Pyrgodesmidae	Cryptocorypha sp. (Attems, 1907)	22.3196	114.219	WGS84	K	China	Kowloon & New Territories	24 03 2020	spring	MW385226	COI
238	Arthropoda	Diplopoda	Polydesmida	Pyrgodesmidae	Cryptocorypha sp. (Attems, 1907)	22.3961	113.9643	WGS84	E	China	Kowloon & New Territories	11 03 2020	spring	MW385227	COI
239	Arthropoda	Diplopoda	Polydesmida	Pyrgodesmidae	Cryptocorypha sp. (Attems, 1907)	22.4553	114.1663	WGS84	P	China	Kowloon & New Territories	16 06 2020	summer	MW385228	COI
240	Arthropoda	Diplopoda	Polydesmida	Haplodesmidae	Prosopodesmus jacobsoni (Silvestri, 1910)	22.3961	113.9643	WGS84	E	China	Kowloon & New Territories	20 02 2020	winter	MW385229	COI
241	Arthropoda	Diplopoda	Polydesmida	Haplodesmidae	Prosopodesmus jacobsoni (Silvestri, 1910)	22.4423	114.0343	WGS84	S	China	Kowloon & New Territories	20 02 2020	winter	MW385230	COI
242	Arthropoda	Diplopoda	Polydesmida	Haplodesmidae	Prosopodesmus jacobsoni (Silvestri, 1910)	22.4423	114.0343	WGS84	S	China	Kowloon & New Territories	20 02 2020	winter	MW385231	COI
243	Arthropoda	Diplopoda	Polydesmida	Haplodesmidae	Prosopodesmus jacobsoni (Silvestri, 1910)	22.3961	113.9643	WGS84	E	China	Kowloon & New Territories	11 03 2020	spring	MW385232	COI
244	Arthropoda	Diplopoda	Polydesmida	Haplodesmidae	Prosopodesmus jacobsoni (Silvestri, 1910)	22.3961	113.9643	WGS84	E	China	Kowloon & New Territories	11 03 2020	spring	MW385233	COI
245	Arthropoda	Diplopoda	Julida	Julidae	Anaulaciulus tonginus (Karsch, 1881)	22.4173	114.2068	WGS84	U	China	Kowloon & New Territories	28 10 2019	autumn	MW385234	COI
246	Arthropoda	Diplopoda	Julida	Julidae	Anaulaciulus tonginus (Karsch, 1881)	22.4173	114.2068	WGS84	U	China	Kowloon & New Territories	28 10 2019	autumn	MW385235	COI
247	Arthropoda	Diplopoda	Julida	Julidae	Anaulaciulus tonginus (Karsch, 1881)	22.4173	114.2068	WGS84	U	China	Kowloon & New Territories	19 02 2020	winter	MW385236	COI
248	Arthropoda	Diplopoda	Glomerida	Glomeridae	Hyleoglomeris bicolor (Wood, 1865)	22.4173	114.2068	WGS84	U	China	Kowloon & New Territories	14 01 2020	winter	MW385237	COI
249	Arthropoda	Diplopoda	Glomerida	Glomeridae	Hyleoglomeris bicolor (Wood, 1865)	22.3961	113.9643	WGS84	E	China	Kowloon & New Territories	20 02 2020	winter	MW385238	COI
250	Arthropoda	Diplopoda	Glomerida	Glomeridae	Hyleoglomeris bicolor (Wood, 1865)	22.3961	113.9643	WGS84	E	China	Kowloon & New Territories	28 04 2020	spring	MW385239	COI
251	Arthropoda	Diplopoda	Polydesmida	Paradoxosomatidae	Paradoxosomatidae sp.	22.4173	114.2068	WGS84	U	China	Kowloon & New Territories	29 05 2020	spring	MW385242	COI
252	Arthropoda	Diplopoda	Polydesmida		Trichopolydesmidae gg. sp.	22.3044	114.2501	WGS84	I	China	Kowloon & New Territories	22 07 2020	summer	MW385243	COI
253	Arthropoda	Diplopoda	Polydesmida		Trichopolydesmidae gg. sp.	22.2906	113.945	WGS84	D	China	Islands	25 08 2020	summer	MW385244	COI
254	Arthropoda	Diplopoda	Spirostreptida	Cambalopsidae	Glyphiulus formosus (Pocock, 1895)	22.4173	114.2068	WGS84	U	China	Kowloon & New Territories	11 06 2020	summer	MW385245	COI
255	Arthropoda	Diplopoda	Polydesmida		Trichopolydesmidae gg. sp.	22.4591	114.0033	WGS84	Q	China	Kowloon & New Territories	25 08 2020	summer	MW385246	COI
256	Arthropoda	Diplopoda	Polydesmida	Haplodesmidae	Eutrichodesmus sp.	22.5017	114.1107	WGS84	H	China	Kowloon & New Territories	17 06 2020	summer	MW385247	COI
257	Arthropoda	Diplopoda	Polydesmida	Haplodesmidae	Eutrichodesmus sp.	22.501	114.1106	WGS84	H	China	Kowloon & New Territories	31 08 2020	summer	MW385248	COI
258	Arthropoda	Diplopoda	Julida	Julidae	Pseudospirobolellidae sp	22.3743	114.1925	WGS84	A	China	Kowloon & New Territories	18 09 2020	autumn	MW385249	COI
259	Arthropoda	Diplopoda	Spirobolida	Spirobolellidae	Paraspirobolus lucifugus (Gervais, 1836)	22.4966	114.1414	WGS84	N	China	Kowloon & New Territories	3 04 2020	spring	MW385954	18S rRNA
260	Arthropoda	Diplopoda	Julida	Julidae	Anaulaciulus tonginus (Karsch, 1881)	22.3743	114.1925	WGS84	A	China	Kowloon & New Territories	22 10 2019	autumn	MW385955	18S rRNA
261	Arthropoda	Diplopoda	Julida	Julidae	Anaulaciulus tonginus (Karsch, 1881)	22.3743	114.1925	WGS84	A	China	Kowloon & New Territories	22 10 2019	autumn	MW385956	18S rRNA
262	Arthropoda	Diplopoda	Julida	Julidae	Anaulaciulus tonginus (Karsch, 1881)	22.3961	113.9643	WGS84	E	China	Kowloon & New Territories	22 10 2019	autumn	MW385957	18S rRNA
263	Arthropoda	Diplopoda	Julida	Julidae	Anaulaciulus tonginus (Karsch, 1881)	22.4545	114.1662	WGS84	P	China	Kowloon & New Territories	14 01 2020	winter	MW385958	18S rRNA
264	Arthropoda	Diplopoda	Polydesmida	Paradoxosomatidae	Helicorthomorpha holstii (Pocock, 1895)	22.3961	113.9643	WGS84	E	China	Kowloon & New Territories	22 10 2019	autumn	MW385959	18S rRNA
265	Arthropoda	Diplopoda	Polydesmida	Paradoxosomatidae	Helicorthomorpha holstii (Pocock, 1895)	22.2166	114.2143	WGS84	C	China	Hong Kong Island	7 04 2020	spring	MW385960	18S rRNA
266	Arthropoda	Diplopoda	Spirostreptida	Cambalopsidae	Glyphiulus granulatus (Gervais, 1847)	22.2869	114.138	WGS84	B	China	Hong Kong Island	25 10 2019	autumn	MW385961	18S rRNA
267	Arthropoda	Diplopoda	Spirostreptida	Cambalopsidae	Glyphiulus granulatus (Gervais, 1847)	22.2869	114.138	WGS84	B	China	Hong Kong Island	25 10 2019	autumn	MW385962	18S rRNA
268	Arthropoda	Diplopoda	Spirostreptida	Cambalopsidae	Glyphiulus granulatus (Gervais, 1847)	22.2869	114.138	WGS84	B	China	Hong Kong Island	25 10 2019	autumn	MW385963	18S rRNA
269	Arthropoda	Diplopoda	Spirostreptida	Cambalopsidae	Glyphiulus granulatus (Gervais, 1847)	22.2869	114.138	WGS84	B	China	Hong Kong Island	6 02 2020	winter	MW385964	18S rRNA
270	Arthropoda	Diplopoda	Polydesmida	Paradoxosomatidae	Orthomorpha coarctata (Saussure, 1860)	22.2869	114.138	WGS84	B	China	Hong Kong Island	27 09 2019	autumn	MW385965	18S rRNA
271	Arthropoda	Diplopoda	Polydesmida	Paradoxosomatidae	Orthomorpha coarctata (Saussure, 1860)	22.2869	114.138	WGS84	B	China	Hong Kong Island	27 09 2019	autumn	MW385966	18S rRNA
272	Arthropoda	Diplopoda	Polydesmida	Paradoxosomatidae	Orthomorpha coarctata (Saussure, 1860)	22.2869	114.138	WGS84	B	China	Hong Kong Island	25 10 2019	autumn	MW385967	18S rRNA
273	Arthropoda	Diplopoda	Polydesmida	Paradoxosomatidae	Orthomorpha coarctata (Saussure, 1860)	22.2869	114.138	WGS84	B	China	Hong Kong Island	25 10 2019	autumn	MW385968	18S rRNA
274	Arthropoda	Diplopoda	Polydesmida	Paradoxosomatidae	Orthomorpha coarctata (Saussure, 1860)	22.2869	114.138	WGS84	B	China	Hong Kong Island	25 10 2019	autumn	MW385969	18S rRNA
275	Arthropoda	Diplopoda	Polydesmida	Paradoxosomatidae	Orthomorpha coarctata (Saussure, 1860)	22.2869	114.138	WGS84	B	China	Hong Kong Island	25 10 2019	autumn	MW385970	18S rRNA
276	Arthropoda	Diplopoda	Polydesmida	Paradoxosomatidae	Orthomorpha coarctata (Saussure, 1860)	22.4593	114.0033	WGS84	Q	China	Kowloon & New Territories	21 04 2020	spring	MW385971	18S rRNA
277	Arthropoda	Diplopoda	Polydesmida	Paradoxosomatidae	Oxidus gracilis (Koch, 1847)	22.2904	113.947	WGS84	D	China	Islands	22 04 2020	spring	MW385972	18S rRNA
278	Arthropoda	Diplopoda	Polyxenida	Lophoproctidae	Alloproctoides remyi (Short, 2015)	22.2906	113.945	WGS84	D	China	Islands	22 04 2020	spring	MW385973	18S rRNA
279	Arthropoda	Diplopoda	Polyxenida	Polyxenidae	Monographis queenslandica (Lucas, 1840)	22.444	114.0234	WGS84	R	China	Kowloon & New Territories	11 03 2020	spring	MW385974	18S rRNA
280	Arthropoda	Diplopoda	Polydesmida	Pyrgodesmidae	Cryptocorypha sp. (Attems, 1907)	22.3961	113.9643	WGS84	E	China	Kowloon & New Territories	11 03 2020	spring	MW385975	18S rRNA
281	Arthropoda	Diplopoda	Polydesmida	Haplodesmidae	Prosopodesmus jacobsoni (Silvestri, 1910)	22.3961	113.9643	WGS84	E	China	Kowloon & New Territories	22 10 2019	autumn	MW385976	18S rRNA
282	Arthropoda	Diplopoda	Polydesmida	Haplodesmidae	Prosopodesmus jacobsoni (Silvestri, 1910)	22.3961	113.9643	WGS84	E	China	Kowloon & New Territories	22 10 2019	autumn	MW385977	18S rRNA
283	Arthropoda	Diplopoda	Polydesmida	Haplodesmidae	Prosopodesmus jacobsoni (Silvestri, 1910)	22.3196	114.219	WGS84	K	China	Kowloon & New Territories	20 04 2020	spring	MW385978	18S rRNA
284	Arthropoda	Diplopoda	Julida	Julidae	Anaulaciulus tonginus (Karsch, 1881)	22.4173	114.2068	WGS84	U	China	Kowloon & New Territories	19 02 2020	winter	MW385979	18S rRNA
285	Arthropoda	Diplopoda	Spirobolida	Pseudospirobolellidae	Pseudospirobolellus avernus (Butler, 1876)	22.287	114.2044	WGS84	M	China	Hong Kong Island	20 05 2020	spring	MW385980	18S rRNA
286	Arthropoda	Diplopoda	Polydesmida	Paradoxosomatidae	Anaulaciulus tonginus (Karsch, 1881)	22.4173	114.2068	WGS84	U	China	Kowloon & New Territories	29 05 2020	spring	MW385981	18S rRNA
287	Arthropoda	Diplopoda	Polydesmida	Paradoxosomatidae	Nedyopus sp.	22.3162	114.185	WGS84	G	China	Kowloon & New Territories	24 03 2020	spring	MW385982	18S rRNA
288	Arthropoda	Diplopoda	Polydesmida		Trichopolydesmidae gg. sp.	22.3044	114.2501	WGS84	I	China	Kowloon & New Territories	22 07 2020	summer	MW385983	18S rRNA
289	Arthropoda	Diplopoda	Spirostreptida	Cambalopsidae	Glyphiulus formosus (Pocock, 1895)	22.4173	114.2068	WGS84	U	China	Kowloon & New Territories	11 06 2020	summer	MW385984	18S rRNA
290	Arthropoda	Diplopoda	Polydesmida		Trichopolydesmidae gg. sp.	22.4591	114.0033	WGS84	Q	China	Kowloon & New Territories	25 08 2020	summer	MW385985	18S rRNA
291	Arthropoda	Diplopoda	Polydesmida	Haplodesmidae	Eutrichodesmus sp.	22.2904	113.947	WGS84	D	China	Islands	11 10 2019	autumn	MW385986	18S rRNA
292	Arthropoda	Diplopoda	Polydesmida	Haplodesmidae	Eutrichodesmus sp.	22.501	114.1106	WGS84	H	China	Kowloon & New Territories	31 08 2020	summer	MW385987	18S rRNA
293	Arthropoda	Diplopoda	Julida	Julidae	Pseudospirobolellidae sp	22.3743	114.1925	WGS84	A	China	Kowloon & New Territories	18 09 2020	autumn	MW385988	18S rRNA
294	Arthropoda	Diplopoda	Spirobolida	Pachybolidae	Trigoniulus corallinus (Shelley & Lehtinen, 1999)	22.4577	114.003	WGS84	Q	China	Kowloon & New Territories	21 04 2020	spring	MW386033	16S rRNA
295	Arthropoda	Diplopoda	Spirobolida	Spirobolellidae	Paraspirobolus lucifugus (Gervais, 1836)	22.4966	114.1414	WGS84	N	China	Kowloon & New Territories	3 04 2020	spring	MW386034	16S rRNA
296	Arthropoda	Diplopoda	Julida	Julidae	Anaulaciulus tonginus (Karsch, 1881)	22.4545	114.1662	WGS84	P	China	Kowloon & New Territories	14 01 2020	winter	MW386035	16S rRNA
297	Arthropoda	Diplopoda	Polydesmida	Paradoxosomatidae	Helicorthomorpha holstii (Pocock, 1895)	22.2166	114.2143	WGS84	C	China	Hong Kong Island	7 04 2020	spring	MW386036	16S rRNA
298	Arthropoda	Diplopoda	Spirostreptida	Cambalopsidae	Glyphiulus granulatus (Gervais, 1847)	22.2869	114.138	WGS84	B	China	Hong Kong Island	6 02 2020	winter	MW386037	16S rRNA
299	Arthropoda	Diplopoda	Spirobolida	Pachybolidae	Leptogoniulus sorornus (Butler, 1876)	22.3957	113.9636	WGS84	E	China	Kowloon & New Territories	11 03 2020	spring	MW386038	16S rRNA
300	Arthropoda	Diplopoda	Polydesmida	Paradoxosomatidae	Asiormorpha coarctata (Saussure, 1860)	22.4593	114.0033	WGS84	Q	China	Kowloon & New Territories	21 04 2020	spring	MW386039	16S rRNA
301	Arthropoda	Diplopoda	Polydesmida	Paradoxosomatidae	Oxidus gracilis (Koch, 1847)	22.2904	113.947	WGS84	D	China	Islands	22 04 2020	spring	MW386040	16S rRNA
302	Arthropoda	Diplopoda	Polyxenida	Lophoproctidae	Alloproctoides remyi (Short, 2015)	22.2906	113.945	WGS84	D	China	Islands	22 04 2020	spring	MW386041	16S rRNA
303	Arthropoda	Diplopoda	Polydesmida	Pyrgodesmidae	Cryptocorypha sp.	22.3961	113.9643	WGS84	E	China	Kowloon & New Territories	11 03 2020	spring	MW386042	16S rRNA
304	Arthropoda	Diplopoda	Julida	Julidae	Anaulaciulus tonginus (Karsch, 1881)	22.4173	114.2068	WGS84	U	China	Kowloon & New Territories	19 02 2020	winter	MW386043	16S rRNA
305	Arthropoda	Diplopoda	Glomerida	Glomeridae	Hyleoglomeris bicolor (Wood, 1865)	22.3961	113.9643	WGS84	E	China	Kowloon & New Territories	28 04 2020	spring	MW386044	16S rRNA
306	Arthropoda	Diplopoda	Sphaerotheriida	Zephroniidae	Zephronia profuga (Attems, 1936)	22.2868	114.2046	WGS84	M	China	Hong Kong Island	17 06 2020	summer	MW386045	16S rRNA
307	Arthropoda	Diplopoda	Spirobolida	Pseudospirobolellidae	Pseudospirobolellus avernus (Butler, 1876)	22.287	114.2044	WGS84	M	China	Hong Kong Island	20 05 2020	spring	MW386046	16S rRNA
308	Arthropoda	Diplopoda	Polydesmida	Paradoxosomatidae	Paradoxosomatidae sp.	22.4173	114.2068	WGS84	U	China	Kowloon & New Territories	29 05 2020	spring	MW386047	16S rRNA
309	Arthropoda	Diplopoda	Polydesmida	Paradoxosomatidae	Nedyopus sp.	22.3162	114.185	WGS84	G	China	Kowloon & New Territories	24 03 2020	spring	MW386048	16S rRNA
310	Arthropoda	Diplopoda	Polydesmida		Trichopolydesmidae gg. sp.	22.3044	114.2501	WGS84	I	China	Kowloon & New Territories	22 07 2020	summer	MW386049	16S rRNA
311	Arthropoda	Diplopoda	Polydesmida		Trichopolydesmidae gg. sp.	22.2906	113.945	WGS84	D	China	Islands	20 10 2020	autumn	MW386050	16S rRNA
312	Arthropoda	Diplopoda	Spirostreptida	Cambalopsidae	Glyphiulus formosus (Pocock, 1895)	22.4173	114.2068	WGS84	U	China	Kowloon & New Territories	11 06 2020	summer	MW386051	16S rRNA
313	Arthropoda	Diplopoda	Polydesmida	Haplodesmidae	Eutrichodesmus sp.	22.501	114.1106	WGS84	H	China	Kowloon & New Territories	31 08 2020	summer	MW386052	16S rRNA
314	Arthropoda	Diplopoda	Julida	Julidae	Pseudospirobolellidae sp	22.3743	114.1925	WGS84	A	China	Kowloon & New Territories	18 09 2020	autumn	MW386053	16S rRNA
315	Arthropoda	Diplopoda	Polydesmida	Haplodesmidae	Prosopodesmus jacobsoni (Silvestri, 1910)	22.3196	114.219	WGS84	K	China	Kowloon & New Territories	20 04 2020	spring	MW414646	COI
316	Arthropoda	Diplopoda	Julida	Julidae	Anaulaciulus tonginus (Karsch, 1881)	22.4966	114.1414	WGS84	N	China	Kowloon & New Territories	21 02 2020	winter	MW431012	COI
317	Arthropoda	Diplopoda	Polydesmida	Paradoxosomatidae	Orthomorpha coarctata (Saussure, 1860)	22.4593	114.0033	WGS84	Q	China	Kowloon & New Territories	17 10 2019	autumn	MW431013	COI
318	Arthropoda	Diplopoda	Polydesmida	Paradoxosomatidae	Nedyopus sp.	22.3162	114.185	WGS84	G	China	Kowloon & New Territories	24 03 2020	spring	MW431014	COI
319	Arthropoda	Diplopoda	Sphaerotheriida	Zephroniidae	Zephronia profuga (Attems, 1936)	22.2868	114.2046	WGS84	M	China	Hong Kong Island	17 06 2020	summer	MW431015	COI
320	Arthropoda	Insecta	Blattodea	Termitidae	Macrotermes barneyi (Light, 1924)	22.3743	114.1925	WGS84	A	China	Kowloon & New Territories	12 09 2019	autumn	MW445911	COI
321	Arthropoda	Insecta	Blattodea	Termitidae	Macrotermes barneyi (Light, 1924)	22.3743	114.1925	WGS84	A	China	Kowloon & New Territories	12 09 2019	autumn	MW445912	COI
322	Arthropoda	Insecta	Hymenoptera	Formicidae	Odontoponera transversa (Smith, 1857)	22.4173	114.2068	WGS84	U	China	Kowloon & New Territories	16 09 2019	autumn	MW450961	COI
323	Arthropoda	Insecta	Hymenoptera	Formicidae	Polyrhachis illaudata (Walker, 1859)	22.4173	114.2068	WGS84	U	China	Kowloon & New Territories	29 11 2019	autumn	MW450962	COI
324	Arthropoda	Chilopoda			Chilopoda sp.	22.2145	114.2159	WGS84	C	China	Hong Kong Island	21 11 2019	autumn	MW450963	COI
325	Arthropoda	Chilopoda	Scolopendromorpha	Cryptopidae	Cryptops sp.	22.2145	114.2159	WGS84	C	China	Hong Kong Island	7 04 2020	spring	MW450964	COI
326	Arthropoda	Chilopoda			Chilopoda sp.	22.3957	113.9636	WGS84	E	China	Kowloon & New Territories	28 04 2020	spring	MW450965	COI
327	Arthropoda	Chilopoda	Scolopendromorpha	Scolopendridae	Scolopendra multidens (Newport, 1844)	22.4553	114.1663	WGS84	P	China	Kowloon & New Territories	21 08 2020	summer	MW450966	COI
328	Arthropoda	Chilopoda	Scolopendromorpha	Cryptopidae	Cryptops sp.	22.4173	114.2068	WGS84	U	China	Kowloon & New Territories	2 03 2020	spring	MW450967	COI
329	Arthropoda	Insecta	Blattodea	Blaberidae	Pycnoscelus surinamensis (Linnaeus, 1758)	22.3743	114.1925	WGS84	A	China	Kowloon & New Territories	23 04 2020	spring	MW450968	COI
330	Arthropoda	Insecta	Blattodea	Blaberidae	Opisthoplatia orientalis (Burmeister, 1838)	22.2166	114.2143	WGS84	C	China	Hong Kong Island	6 12 2019	winter	MW450969	COI
331	Arthropoda	Insecta	Blattodea	Blaberidae	Pycnoscelus surinamensis (Linnaeus, 1758)	22.2166	114.2143	WGS84	C	China	Hong Kong Island	17 12 2019	winter	MW450970	COI
332	Arthropoda	Insecta	Blattodea	Blaberidae	Pycnoscelus surinamensis (Linnaeus, 1758)	22.2166	114.2143	WGS84	C	China	Hong Kong Island	28 02 2020	winter	MW450971	COI
333	Arthropoda	Insecta	Blattodea	Blaberidae	Pycnoscelus surinamensis (Linnaeus, 1758)	22.2166	114.2143	WGS84	C	China	Hong Kong Island	7 04 2020	spring	MW450972	COI
334	Arthropoda	Insecta	Blattodea	Blaberidae	Pycnoscelus surinamensis (Linnaeus, 1758)	22.5017	114.1107	WGS84	H	China	Kowloon & New Territories	28 10 2019	autumn	MW450973	COI
335	Arthropoda	Insecta	Blattodea	Blaberidae	Opisthoplatia orientalis (Burmeister, 1838)	22.4173	114.2068	WGS84	U	China	Kowloon & New Territories	5 10 2019	autumn	MW450974	COI
336	Arthropoda	Insecta	Coleoptera		Coleoptera sp.	22.2145	114.2159	WGS84	C	China	Hong Kong Island	28 02 2020	winter	MW450975	COI
337	Arthropoda	Insecta	Coleoptera		Coleoptera sp.	22.2145	114.2159	WGS84	C	China	Hong Kong Island	7 04 2020	spring	MW450976	COI
338	Arthropoda	Insecta	Coleoptera	Coccinellidae	Platynaspis maculosa	22.2904	113.947	WGS84	D	China	Islands	25 08 2020	summer	MW450977	COI
339	Annelida	Clitellata	Crassiclitellata	Megascolecidae	Amynthas robustus (Perrier, 1872)	22.2145	114.2159	WGS84	C	China	Hong Kong Island	28 02 2020	winter	MW450978	COI
340	Annelida	Clitellata	Crassiclitellata	Megascolecidae	Amynthas robustus (Perrier, 1872)	22.2166	114.2143	WGS84	C	China	Hong Kong Island	28 02 2020	winter	MW450979	COI
341	Annelida	Clitellata	Crassiclitellata	Megascolecidae	Amynthas wujhouensis (C-H.Chang, C-L.Li, Chih & J-H.Chen, 2013)	22.3367	114.1954	WGS84	F	China	Kowloon & New Territories	20 12 2019	winter	MW450980	COI
342	Arthropoda	Insecta	Dermaptera	Anisolabididae	Euborellia arcanum (Matzke & Kočárek, 2015)	22.2866	114.1375	WGS84	B	China	Hong Kong Island	25 03 2020	spring	MW450981	COI
343	Arthropoda	Insecta	Hemiptera		Pentatomoidea sp.	22.2904	113.947	WGS84	D	China	Islands	24 06 2020	summer	MW450982	COI
344	Arthropoda	Insecta	Hemiptera		Heteroptera sp.	22.3367	114.1954	WGS84	F	China	Kowloon & New Territories	20 12 2019	winter	MW450983	COI
345	Mollusca	Gastropoda	Systellommatophora	Veronicellidae	Laevicaulis alte (Férussac, 1822)	22.3367	114.1954	WGS84	F	China	Kowloon & New Territories	20 12 2019	winter	MW450984	COI
346	Arthropoda	Arachnida	Araneae	Lycosidae	Pirata procurvus (F�russac, 1822)	22.4173	114.2068	WGS84	U	China	Kowloon & New Territories	5 10 2019	autumn	MW450985	COI
347	Arthropoda	Arachnida	Araneae	Lycosidae	Pirata procurvus (F�russac, 1822)	22.4173	114.2068	WGS84	U	China	Kowloon & New Territories	18 12 2019	winter	MW450986	COI
348	Arthropoda	Arachnida	Araneae	Lycosidae	Pirata procurvus (F�russac, 1822)	22.4173	114.2068	WGS84	U	China	Kowloon & New Territories	4 02 2020	winter	MW450987	COI
349	Arthropoda	Malacostraca	Isopoda		Isopoda sp.	22.4577	114.003	WGS84	Q	China	Kowloon & New Territories	21 04 2020	spring	MW459322	COI
350	Arthropoda	Insecta	Hymenoptera	Formicidae	Ectomomyrmex javanus (Mayr, 1867)	22.3743	114.1925	WGS84	A	China	Kowloon & New Territories	12 03 2020	spring	MW476842	COI
351	Arthropoda	Insecta	Hymenoptera	Formicidae	Formicidae sp.	22.2166	114.2143	WGS84	C	China	Hong Kong Island	6 12 2019	winter	MW476843	COI
352	Arthropoda	Insecta	Hymenoptera	Formicidae	Camponotus nicobarensis (Mayr, 1865)	22.3961	113.9643	WGS84	E	China	Kowloon & New Territories	28 04 2020	spring	MW476844	COI
353	Arthropoda	Insecta	Hymenoptera	Formicidae	Oecophylla smaragdina (Fabricius, 1775)	22.501	114.1106	WGS84	H	China	Kowloon & New Territories	24 09 2019	autumn	MW476845	COI
354	Arthropoda	Insecta	Hymenoptera	Formicidae	Crematogaster aberrans (Forel, 1892)	22.4532	114.1641	WGS84	O	China	Kowloon & New Territories	15 10 2019	autumn	MW476846	COI
355	Arthropoda	Insecta	Hymenoptera	Formicidae	Paratrechina longicornis (Latreille, 1802)	22.453	114.1634	WGS84	O	China	Kowloon & New Territories	17 12 2019	winter	MW476847	COI
356	Arthropoda	Insecta	Hymenoptera	Formicidae	Solenopsis invicta (Buren, 1972)	22.4577	114.003	WGS84	Q	China	Kowloon & New Territories	18 12 2019	winter	MW476848	COI
357	Arthropoda	Insecta	Hymenoptera	Formicidae	Pheidole megacephala (Fabricius, 1793)	22.444	114.0234	WGS84	R	China	Kowloon & New Territories	20 02 2020	winter	MW476849	COI
358	Arthropoda	Insecta	Hymenoptera	Formicidae	Pheidole parva (Mayr, 1865)	22.4411	114.0345	WGS84	S	China	Kowloon & New Territories	25 08 2020	summer	MW476850	COI
359	Arthropoda	Insecta	Hymenoptera	Formicidae	Odontoponera transversa (Smith, 1857)	22.2052	114.0372	WGS84	T	China	Islands	4 11 2019	autumn	MW476851	COI
360	Arthropoda	Insecta	Hymenoptera	Formicidae	Anoplolepis gracilipes (Smith, 1857)	22.2071	114.0374	WGS84	T	China	Islands	4 11 2019	autumn	MW476852	COI
361	Arthropoda	Insecta	Hymenoptera	Formicidae	Pseudoneoponera rufipes	22.2052	114.0372	WGS84	T	China	Islands	26 11 2019	autumn	MW476853	COI
362	Arthropoda	Insecta	Hymenoptera	Formicidae	Odontoponera transversa (Smith, 1857)	22.2052	114.0372	WGS84	T	China	Islands	31 12 2019	winter	MW476854	COI
363	Arthropoda	Insecta	Hymenoptera	Formicidae	Pseudoneoponera rufipes	22.2052	114.0372	WGS84	T	China	Islands	31 12 2019	winter	MW476855	COI
364	Arthropoda	Insecta	Hymenoptera	Formicidae	Anoplolepis gracilipes (Smith, 1857)	22.2071	114.0374	WGS84	T	China	Islands	31 12 2019	winter	MW476856	COI
365	Arthropoda	Insecta	Hymenoptera	Formicidae	Polyrhachis illaudata (Walker, 1859)	22.2052	114.0372	WGS84	T	China	Islands	3 04 2020	spring	MW476857	COI
366	Arthropoda	Insecta	Hymenoptera	Formicidae	Anoplolepis gracilipes (Smith, 1857)	22.2071	114.0374	WGS84	T	China	Islands	3 04 2020	spring	MW476858	COI
367	Arthropoda	Insecta	Hymenoptera	Formicidae	Ectomomyrmex javanus (Mayr, 1867)	22.4173	114.2068	WGS84	U	China	Kowloon & New Territories	5 10 2019	autumn	MW476859	COI
368	Arthropoda	Insecta	Hymenoptera	Formicidae	Anoplolepis gracilipes (Smith, 1857)	22.4173	114.2068	WGS84	U	China	Kowloon & New Territories	18 12 2019	winter	MW476860	COI
369	Arthropoda	Insecta	Hymenoptera	Formicidae	Ectomomyrmex javanus (Mayr, 1867)	22.4173	114.2068	WGS84	U	China	Kowloon & New Territories	18 12 2019	winter	MW476861	COI
370	Arthropoda	Insecta	Hymenoptera	Formicidae	Polyrhachis illaudata (Walker, 1859)	22.4173	114.2068	WGS84	U	China	Kowloon & New Territories	8 04 2020	spring	MW476862	COI
371	Arthropoda	Chilopoda	Scolopendromorpha	Scolopendridae	Scolopendridae	22.3743	114.1925	WGS84	A	China	Kowloon & New Territories	22 10 2019	autumn	MW476863	COI
372	Arthropoda	Chilopoda	Scolopendromorpha	Scolopendridae	Scolopendridae	22.3743	114.1925	WGS84	A	China	Kowloon & New Territories	22 10 2019	autumn	MW476864	COI
373	Arthropoda	Chilopoda	Scolopendromorpha	Scolopendridae	Scolopendridae	22.3743	114.1925	WGS84	A	China	Kowloon & New Territories	22 10 2019	autumn	MW476865	COI
374	Arthropoda	Chilopoda	Scolopendromorpha	Scolopendridae	Otostigmus aculeatus (Haase, 1887)	22.3743	114.1925	WGS84	A	China	Kowloon & New Territories	22 10 2019	autumn	MW476866	COI
375	Arthropoda	Chilopoda	Scolopendromorpha	Scolopendridae	Otostigmus aculeatus (Haase, 1887)	22.3757	114.192	WGS84	A	China	Kowloon & New Territories	5 12 2019	winter	MW476867	COI
376	Arthropoda	Chilopoda	Scolopendromorpha	Scolopendridae	Otostigmus aculeatus (Haase, 1887)	22.3743	114.1925	WGS84	A	China	Kowloon & New Territories	20 12 2019	winter	MW476868	COI
377	Arthropoda	Chilopoda	Scolopendromorpha	Cryptopidae	Cryptops sp.	22.3743	114.1925	WGS84	A	China	Kowloon & New Territories	20 12 2019	winter	MW476869	COI
378	Arthropoda	Chilopoda	Scolopendromorpha	Cryptopidae	Cryptops sp.	22.3757	114.192	WGS84	A	China	Kowloon & New Territories	23 04 2020	spring	MW476870	COI
379	Arthropoda	Chilopoda	Scolopendromorpha	Scolopendridae	Scolopendridae	22.3743	114.1925	WGS84	A	China	Kowloon & New Territories	23 04 2020	spring	MW476871	COI
380	Arthropoda	Chilopoda	Scolopendromorpha	Cryptopidae	Cryptops sp.	22.2145	114.2159	WGS84	C	China	Hong Kong Island	7 04 2020	spring	MW476872	COI
381	Arthropoda	Chilopoda	Geophilomorpha	Mecistocephalidae	Mecistocephalidae sp.	22.2906	113.945	WGS84	D	China	Islands	25 11 2019	autumn	MW476873	COI
382	Arthropoda	Chilopoda	Scolopendromorpha	Scolopendridae	Rhysida longipes (Newport, 1845)	22.3961	113.9643	WGS84	E	China	Kowloon & New Territories	22 10 2019	autumn	MW476874	COI
383	Arthropoda	Chilopoda			Chilopoda sp.	22.3957	113.9636	WGS84	E	China	Kowloon & New Territories	28 11 2019	autumn	MW476875	COI
384	Arthropoda	Chilopoda			Chilopoda sp.	22.3957	113.9636	WGS84	E	China	Kowloon & New Territories	28 11 2019	autumn	MW476876	COI
385	Arthropoda	Chilopoda			Chilopoda sp.	22.3961	113.9643	WGS84	E	China	Kowloon & New Territories	11 03 2020	spring	MW476877	COI
386	Arthropoda	Chilopoda	Scolopendromorpha	Cryptopidae	Cryptops sp.	22.3961	113.9643	WGS84	E	China	Kowloon & New Territories	11 03 2020	spring	MW476878	COI
387	Arthropoda	Chilopoda	Scolopendromorpha	Cryptopidae	Cryptops sp.	22.3961	113.9643	WGS84	E	China	Kowloon & New Territories	11 03 2020	spring	MW476879	COI
388	Arthropoda	Chilopoda	Scolopendromorpha	Cryptopidae	Cryptops sp.	22.3961	113.9643	WGS84	E	China	Kowloon & New Territories	28 04 2020	spring	MW476880	COI
389	Arthropoda	Chilopoda	Geophilomorpha	Mecistocephalidae	Mecistocephalidae sp.	22.3367	114.1954	WGS84	F	China	Kowloon & New Territories	12 10 2019	autumn	MW476881	COI
390	Arthropoda	Chilopoda	Geophilomorpha	Mecistocephalidae	Mecistocephalidae sp.	22.3367	114.1954	WGS84	F	China	Kowloon & New Territories	6 11 2019	autumn	MW476882	COI
391	Arthropoda	Chilopoda	Geophilomorpha	Mecistocephalidae	Mecistocephalidae sp.	22.3206	114.186	WGS84	G	China	Kowloon & New Territories	8 10 2019	autumn	MW476883	COI
392	Arthropoda	Chilopoda	Geophilomorpha	Mecistocephalidae	Mecistocephalidae sp.	22.3206	114.186	WGS84	G	China	Kowloon & New Territories	8 10 2019	autumn	MW476884	COI
393	Arthropoda	Chilopoda	Scolopendromorpha	Cryptopidae	Cryptops sp.	22.3183	114.1859	WGS84	G	China	Kowloon & New Territories	8 10 2019	autumn	MW476885	COI
394	Arthropoda	Chilopoda	Scolopendromorpha	Scolopendridae	Scolopendridae	22.3183	114.1859	WGS84	G	China	Kowloon & New Territories	8 10 2019	autumn	MW476886	COI
395	Arthropoda	Chilopoda	Scolopendromorpha	Scolopendridae	Rhysida immarginata (Porat, 1876)	22.3183	114.1859	WGS84	G	China	Kowloon & New Territories	27 11 2019	autumn	MW476887	COI
396	Arthropoda	Chilopoda	Scolopendromorpha	Scolopendridae	Scolopendridae	22.3206	114.186	WGS84	G	China	Kowloon & New Territories	23 12 2019	winter	MW476888	COI
397	Arthropoda	Chilopoda			Chilopoda sp.	22.5017	114.1107	WGS84	H	China	Kowloon & New Territories	24 09 2019	autumn	MW476889	COI
398	Arthropoda	Chilopoda	Scolopendromorpha	Scolopendridae	Rhysida longipes (Newport, 1845)	22.3044	114.2501	WGS84	I	China	Kowloon & New Territories	2 12 2019	winter	MW476890	COI
399	Arthropoda	Chilopoda	Scolopendromorpha	Scolopendridae	Rhysida longipes (Newport, 1845)	22.3044	114.2501	WGS84	I	China	Kowloon & New Territories	10 03 2020	spring	MW476891	COI
400	Arthropoda	Chilopoda	Scolopendromorpha	Scolopendridae	Rhysida immarginata (Porat, 1876)	22.4966	114.1414	WGS84	N	China	Kowloon & New Territories	30 10 2019	autumn	MW476892	COI
401	Arthropoda	Chilopoda	Geophilomorpha	Mecistocephalidae	Mecistocephalidae sp.	22.4966	114.1414	WGS84	N	China	Kowloon & New Territories	12 12 2019	winter	MW476893	COI
402	Arthropoda	Chilopoda			Chilopoda sp.	22.4966	114.1414	WGS84	N	China	Kowloon & New Territories	21 02 2020	winter	MW476894	COI
403	Arthropoda	Chilopoda	Scolopendromorpha	Cryptopidae	Cryptops sp.	22.4966	114.1414	WGS84	N	China	Kowloon & New Territories	1 04 2020	spring	MW476895	COI
404	Arthropoda	Chilopoda	Lithobiomorpha	Lithobiidae	Lithobiidae sp.	22.4966	114.1414	WGS84	N	China	Kowloon & New Territories	3 04 2020	spring	MW476896	COI
405	Arthropoda	Chilopoda	Scolopendromorpha	Scolopendridae	Rhysida immarginata (Porat, 1876)	22.4538	114.1631	WGS84	O	China	Kowloon & New Territories	19 12 2019	winter	MW476897	COI
406	Arthropoda	Chilopoda	Geophilomorpha	Mecistocephalidae	Mecistocephalidae sp.	22.4556	114.1671	WGS84	P	China	Kowloon & New Territories	10 10 2019	autumn	MW476898	COI
407	Arthropoda	Chilopoda	Scolopendromorpha	Scolopendridae	Rhysida immarginata (Porat, 1876)	22.4545	114.1662	WGS84	P	China	Kowloon & New Territories	10 10 2019	autumn	MW476899	COI
408	Arthropoda	Chilopoda			Chilopoda sp.	22.4553	114.1663	WGS84	P	China	Kowloon & New Territories	14 01 2020	winter	MW476900	COI
409	Arthropoda	Chilopoda	Scolopendromorpha	Scolopendridae	Rhysida longipes (Newport, 1845)	22.4556	114.1671	WGS84	P	China	Kowloon & New Territories	21 02 2020	winter	MW476901	COI
410	Arthropoda	Chilopoda	Scolopendromorpha	Cryptopidae	Cryptops sp.	22.4556	114.1671	WGS84	P	China	Kowloon & New Territories	12 03 2020	spring	MW476902	COI
411	Arthropoda	Chilopoda	Scolopendromorpha	Cryptopidae	Cryptops sp.	22.4577	114.003	WGS84	Q	China	Kowloon & New Territories	20 02 2020	winter	MW476903	COI
412	Arthropoda	Chilopoda	Scolopendromorpha	Cryptopidae	Cryptops sp.	22.4577	114.003	WGS84	Q	China	Kowloon & New Territories	20 02 2020	winter	MW476904	COI
413	Arthropoda	Chilopoda	Scolopendromorpha	Scolopendridae	Rhysida longipes (Newport, 1845)	22.4425	114.0229	WGS84	R	China	Kowloon & New Territories	5 12 2019	winter	MW476905	COI
414	Arthropoda	Chilopoda	Scolopendromorpha	Cryptopidae	Cryptops sp.	22.444	114.0234	WGS84	R	China	Kowloon & New Territories	20 02 2020	winter	MW476906	COI
415	Arthropoda	Chilopoda	Geophilomorpha	Mecistocephalidae	Mecistocephalidae sp.	22.444	114.0234	WGS84	R	China	Kowloon & New Territories	11 03 2020	spring	MW476907	COI
416	Arthropoda	Chilopoda			Chilopoda sp.	22.444	114.0234	WGS84	R	China	Kowloon & New Territories	11 03 2020	spring	MW476908	COI
417	Arthropoda	Chilopoda			Chilopoda sp.	22.4423	114.0343	WGS84	S	China	Kowloon & New Territories	18 10 2019	autumn	MW476909	COI
418	Arthropoda	Chilopoda	Scolopendromorpha	Scolopendridae	Rhysida longipes (Newport, 1845)	22.4411	114.0345	WGS84	S	China	Kowloon & New Territories	15 01 2020	winter	MW476910	COI
419	Arthropoda	Chilopoda	Scolopendromorpha	Cryptopidae	Cryptops sp.	22.4411	114.0345	WGS84	S	China	Kowloon & New Territories	22 04 2020	spring	MW476911	COI
420	Arthropoda	Chilopoda			Chilopoda sp.	22.4423	114.0343	WGS84	S	China	Kowloon & New Territories	22 04 2020	spring	MW476912	COI
421	Arthropoda	Chilopoda	Scolopendromorpha	Scolopendridae	Scolopendridae	22.2052	114.0372	WGS84	T	China	Islands	31 12 2019	winter	MW476913	COI
422	Arthropoda	Chilopoda	Scolopendromorpha	Cryptopidae	Cryptops sp.	22.4173	114.2068	WGS84	U	China	Kowloon & New Territories	5 10 2019	autumn	MW476914	COI
423	Arthropoda	Chilopoda	Scolopendromorpha	Scolopendridae	Scolopendridae	22.4173	114.2068	WGS84	U	China	Kowloon & New Territories	5 10 2019	autumn	MW476915	COI
424	Arthropoda	Chilopoda	Scolopendromorpha	Cryptopidae	Cryptops sp.	22.4173	114.2068	WGS84	U	China	Kowloon & New Territories	5 10 2019	autumn	MW476916	COI
425	Arthropoda	Chilopoda	Scolopendromorpha	Cryptopidae	Cryptops sp.	22.4173	114.2068	WGS84	U	China	Kowloon & New Territories	28 10 2019	autumn	MW476917	COI
426	Arthropoda	Chilopoda	Scolopendromorpha	Cryptopidae	Cryptops sp.	22.4173	114.2068	WGS84	U	China	Kowloon & New Territories	28 10 2019	autumn	MW476918	COI
427	Arthropoda	Chilopoda	Scolopendromorpha	Cryptopidae	Cryptops sp.	22.4173	114.2068	WGS84	U	China	Kowloon & New Territories	28 10 2019	autumn	MW476919	COI
428	Arthropoda	Chilopoda	Scolopendromorpha	Scolopendridae	Scolopendridae	22.4173	114.2068	WGS84	U	China	Kowloon & New Territories	14 01 2020	winter	MW476920	COI
429	Arthropoda	Chilopoda	Scolopendromorpha	Scolopendridae	Scolopendridae	22.4173	114.2068	WGS84	U	China	Kowloon & New Territories	2 03 2020	spring	MW476921	COI
430	Arthropoda	Chilopoda	Scolopendromorpha	Cryptopidae	Cryptops sp.	22.4173	114.2068	WGS84	U	China	Kowloon & New Territories	23 03 2020	spring	MW476922	COI
431	Arthropoda	Chilopoda	Lithobiomorpha	Lithobiidae	Lithobiidae sp.	22.4173	114.2068	WGS84	U	China	Kowloon & New Territories	23 03 2020	spring	MW476923	COI
432	Arthropoda	Chilopoda	Scolopendromorpha	Scolopendridae	Scolopendridae	22.4173	114.2068	WGS84	U	China	Kowloon & New Territories	8 04 2020	spring	MW476924	COI
433	Arthropoda	Insecta	Blattodea	Blaberidae	Pycnoscelus surinamensis (Linnaeus, 1758)	22.3743	114.1925	WGS84	A	China	Kowloon & New Territories	20 12 2019	winter	MW476925	COI
434	Arthropoda	Insecta	Blattodea	Blaberidae	Blattella singularis	22.3743	114.1925	WGS84	A	China	Kowloon & New Territories	12 03 2020	spring	MW476926	COI
435	Annelida	Clitellata	Crassiclitellata	Megascolecidae	Amynthas morrisi (Beddard, 1892)	22.4411	114.0345	WGS84	S	China	Kowloon & New Territories	29 11 2019	autumn	MW519096	COI
436	Annelida	Clitellata	Crassiclitellata	Megascolecidae	Amynthas morrisi (Beddard, 1892)	22.4411	114.0345	WGS84	S	China	Kowloon & New Territories	29 11 2019	autumn	MW519097	COI
437	Annelida	Clitellata	Crassiclitellata	Megascolecidae	Metaphire californica (Kinberg, 1867)	22.4411	114.0345	WGS84	S	China	Kowloon & New Territories	29 11 2019	autumn	MW519098	COI
438	Annelida	Clitellata	Crassiclitellata	Megascolecidae	Metaphire californica (Kinberg, 1867)	22.4423	114.0343	WGS84	S	China	Kowloon & New Territories	15 01 2020	winter	MW519099	COI
439	Annelida	Clitellata	Crassiclitellata	Megascolecidae	Amynthas robustus (Perrier, 1872)	22.4423	114.0343	WGS84	S	China	Kowloon & New Territories	15 01 2020	winter	MW519100	COI
440	Annelida	Clitellata	Crassiclitellata	Megascolecidae	Amynthas robustus (Perrier, 1872)	22.4423	114.0343	WGS84	S	China	Kowloon & New Territories	15 01 2020	winter	MW519101	COI
441	Annelida	Clitellata	Crassiclitellata	Megascolecidae	Metaphire californica (Kinberg, 1867)	22.4411	114.0345	WGS84	S	China	Kowloon & New Territories	20 02 2020	winter	MW519102	COI
442	Annelida	Clitellata	Crassiclitellata	Megascolecidae	Amynthas robustus (Perrier, 1872)	22.4411	114.0345	WGS84	S	China	Kowloon & New Territories	11 03 2020	spring	MW519103	COI
443	Annelida	Clitellata	Crassiclitellata	Megascolecidae	Metaphire californica (Kinberg, 1867)	22.4423	114.0343	WGS84	S	China	Kowloon & New Territories	11 03 2020	spring	MW519104	COI
444	Annelida	Clitellata	Haplotaxida		Haplotaxida sp.	22.4423	114.0343	WGS84	S	China	Kowloon & New Territories	22 04 2020	spring	MW519105	COI
445	Annelida	Clitellata	Crassiclitellata	Megascolecidae	Metaphire californica (Kinberg, 1867)	22.2052	114.0372	WGS84	T	China	Islands	4 11 2019	autumn	MW519106	COI
446	Arthropoda	Insecta	Dermaptera		Dermaptera sp.	22.3743	114.1925	WGS84	A	China	Kowloon & New Territories	23 04 2020	spring	MW519107	COI
447	Arthropoda	Insecta	Dermaptera		Dermaptera sp.	22.3957	113.9636	WGS84	E	China	Kowloon & New Territories	11 03 2020	spring	MW519108	COI
448	Arthropoda	Insecta	Dermaptera		Dermaptera sp.	22.4545	114.1662	WGS84	P	China	Kowloon & New Territories	21 02 2020	winter	MW519109	COI
449	Arthropoda	Insecta	Dermaptera		Dermaptera sp.	22.4545	114.1662	WGS84	P	China	Kowloon & New Territories	12 03 2020	spring	MW519110	COI
450	Arthropoda	Insecta	Dermaptera		Dermaptera sp.	22.4411	114.0345	WGS84	S	China	Kowloon & New Territories	15 01 2020	winter	MW519111	COI
451	Arthropoda	Insecta	Dermaptera		Dermaptera sp.	22.4411	114.0345	WGS84	S	China	Kowloon & New Territories	20 02 2020	winter	MW519112	COI
452	Arthropoda	Insecta	Dermaptera		Dermaptera sp.	22.4173	114.2068	WGS84	U	China	Kowloon & New Territories	5 10 2019	autumn	MW519113	COI
453	Arthropoda	Insecta	Hemiptera	Pentatomidae	Eysarcoris guttigerus (Thunberg, 1783)	22.3961	113.9643	WGS84	E	China	Kowloon & New Territories	24 06 2020	summer	MW519114	COI
454	Arthropoda	Insecta	Hemiptera		Heteroptera sp.	22.3957	113.9636	WGS84	E	China	Kowloon & New Territories	21 07 2020	summer	MW519115	COI
455	Arthropoda	Insecta	Hemiptera		Heteroptera sp.	22.3957	113.9636	WGS84	E	China	Kowloon & New Territories	25 08 2020	summer	MW519116	COI
456	Arthropoda	Insecta	Hemiptera		Heteroptera sp.	22.3367	114.1954	WGS84	F	China	Kowloon & New Territories	20 12 2019	winter	MW519117	COI
457	Arthropoda	Insecta	Hemiptera	Cydnidae	Macroscytus japonensis (Scott, 1874)	22.3367	114.1954	WGS84	F	China	Kowloon & New Territories	24 03 2020	spring	MW519118	COI
458	Arthropoda	Insecta	Hemiptera		Heteroptera sp.	22.5017	114.1107	WGS84	H	China	Kowloon & New Territories	25 09 2020	autumn	MW519119	COI
459	Arthropoda	Insecta	Hemiptera	Pentatomidae	Pentatomoidea sp.	22.4966	114.1414	WGS84	N	China	Kowloon & New Territories	11 08 2020	summer	MW519120	COI
460	Arthropoda	Insecta	Hemiptera		Heteroptera sp.	22.4556	114.1671	WGS84	P	China	Kowloon & New Territories	12 03 2020	spring	MW519121	COI
461	Arthropoda	Insecta	Hemiptera		Heteroptera sp.	22.4556	114.1671	WGS84	P	China	Kowloon & New Territories	22 04 2020	spring	MW519122	COI
462	Arthropoda	Insecta	Hemiptera		Heteroptera sp.	22.4556	114.1671	WGS84	P	China	Kowloon & New Territories	16 06 2020	summer	MW519123	COI
463	Arthropoda	Insecta	Hemiptera		Heteroptera sp.	22.4425	114.0229	WGS84	R	China	Kowloon & New Territories	21 07 2020	summer	MW519124	COI
464	Arthropoda	Insecta	Hemiptera	Aradidae	Brachyrhynchus triangulus (Bergroth, 1889)	22.4411	114.0345	WGS84	S	China	Kowloon & New Territories	21 07 2020	summer	MW519125	COI
465	Arthropoda	Insecta	Hemiptera		Heteroptera sp.	22.4173	114.2068	WGS84	U	China	Kowloon & New Territories	18 12 2019	winter	MW519126	COI
466	Arthropoda	Malacostraca	Isopoda		Isopoda sp.	22.3743	114.1925	WGS84	A	China	Kowloon & New Territories	28 11 2019	autumn	MW519127	COI
467	Arthropoda	Malacostraca	Isopoda	Philosciidae	Burmoniscus kathmandius (Schmalfuss, 1983)	22.3743	114.1925	WGS84	A	China	Kowloon & New Territories	26 03 2020	spring	MW519128	COI
468	Arthropoda	Malacostraca	Isopoda		Isopoda sp.	22.3757	114.192	WGS84	A	China	Kowloon & New Territories	23 04 2020	spring	MW519129	COI
469	Arthropoda	Malacostraca	Isopoda		Isopoda sp.	22.2145	114.2159	WGS84	C	China	Hong Kong Island	21 11 2019	autumn	MW519130	COI
470	Arthropoda	Malacostraca	Isopoda	Philosciidae	Burmoniscus kathmandius (Schmalfuss, 1983)	22.2145	114.2159	WGS84	C	China	Hong Kong Island	28 02 2020	winter	MW519131	COI
471	Arthropoda	Malacostraca	Isopoda	Philosciidae	Burmoniscus kathmandius (Schmalfuss, 1983)	22.2904	113.947	WGS84	D	China	Islands	11 03 2020	spring	MW519132	COI
472	Arthropoda	Malacostraca	Isopoda	Platyarthridae	Trichorhina tomentosa (Budde-Lund, 1893)	22.3961	113.9643	WGS84	E	China	Kowloon & New Territories	30 12 2019	winter	MW519133	COI
473	Arthropoda	Malacostraca	Isopoda		Isopoda sp.	22.3961	113.9643	WGS84	E	China	Kowloon & New Territories	11 03 2020	spring	MW519134	COI
474	Arthropoda	Malacostraca	Isopoda	Philosciidae	Burmoniscus kathmandius (Schmalfuss, 1983)	22.3957	113.9636	WGS84	E	China	Kowloon & New Territories	28 04 2020	spring	MW519135	COI
475	Arthropoda	Malacostraca	Isopoda	Philosciidae	Burmoniscus kathmandius (Schmalfuss, 1983)	22.5017	114.1107	WGS84	H	China	Kowloon & New Territories	24 09 2019	autumn	MW519136	COI
476	Arthropoda	Malacostraca	Isopoda	Philosciidae	Burmoniscus kathmandius (Schmalfuss, 1983)	22.3196	114.219	WGS84	K	China	Kowloon & New Territories	29 11 2019	autumn	MW519137	COI
477	Arthropoda	Malacostraca	Isopoda	Philosciidae	Burmoniscus kathmandius (Schmalfuss, 1983)	22.4556	114.1671	WGS84	P	China	Kowloon & New Territories	21 02 2020	winter	MW519138	COI
478	Arthropoda	Malacostraca	Isopoda	Philosciidae	Burmoniscus kathmandius (Schmalfuss, 1983)	22.4556	114.1671	WGS84	P	China	Kowloon & New Territories	21 02 2020	winter	MW519139	COI
479	Arthropoda	Malacostraca	Isopoda	Philosciidae	Burmoniscus kathmandius (Schmalfuss, 1983)	22.4556	114.1671	WGS84	P	China	Kowloon & New Territories	22 04 2020	spring	MW519140	COI
480	Arthropoda	Malacostraca	Isopoda	Philosciidae	Burmoniscus kathmandius (Schmalfuss, 1983)	22.4556	114.1671	WGS84	P	China	Kowloon & New Territories	22 04 2020	spring	MW519141	COI
481	Arthropoda	Malacostraca	Isopoda		Isopoda sp.	22.4411	114.0345	WGS84	S	China	Kowloon & New Territories	11 03 2020	spring	MW519142	COI
482	Arthropoda	Malacostraca	Isopoda		Isopoda sp.	22.4411	114.0345	WGS84	S	China	Kowloon & New Territories	11 03 2020	spring	MW519143	COI
483	Arthropoda	Malacostraca	Isopoda		Isopoda sp.	22.2071	114.0374	WGS84	T	China	Islands	31 12 2019	winter	MW519144	COI
484	Arthropoda	Malacostraca	Isopoda		Isopoda sp.	22.2071	114.0374	WGS84	T	China	Islands	23 07 2020	summer	MW519145	COI
485	Arthropoda	Malacostraca	Isopoda	Philosciidae	Burmoniscus kathmandius (Schmalfuss, 1983)	22.4173	114.2068	WGS84	U	China	Kowloon & New Territories	18 12 2019	winter	MW519146	COI
486	Arthropoda	Malacostraca	Isopoda		Isopoda sp.	22.4173	114.2068	WGS84	U	China	Kowloon & New Territories	30 12 2019	winter	MW519147	COI
487	Arthropoda	Malacostraca	Isopoda		Isopoda sp.	22.4173	114.2068	WGS84	U	China	Kowloon & New Territories	30 12 2019	winter	MW519148	COI
488	Annelida	Clitellata	Crassiclitellata	Megascolecidae	Amynthas wujhouensis (C-H.Chang, C-L.Li, Chih & J-H.Chen, 2013)	22.3367	114.1954	WGS84	F	China	Kowloon & New Territories	6 11 2019	autumn	MW525131	COI
489	Annelida	Clitellata	Crassiclitellata	Megascolecidae	Amynthas wujhouensis (C-H.Chang, C-L.Li, Chih & J-H.Chen, 2013)	22.3367	114.1954	WGS84	F	China	Kowloon & New Territories	27 11 2019	autumn	MW525132	COI
490	Annelida	Clitellata	Crassiclitellata	Megascolecidae	Amynthas robustus (Perrier, 1872)	22.3367	114.1954	WGS84	F	China	Kowloon & New Territories	20 12 2019	winter	MW525133	COI
491	Annelida	Clitellata	Crassiclitellata	Megascolecidae	Metaphire californica (Kinberg, 1867)	22.3206	114.186	WGS84	G	China	Kowloon & New Territories	8 10 2019	autumn	MW525134	COI
492	Annelida	Clitellata	Crassiclitellata	Megascolecidae	Metaphire californica (Kinberg, 1867)	22.3206	114.186	WGS84	G	China	Kowloon & New Territories	8 10 2019	autumn	MW525135	COI
493	Annelida	Clitellata	Crassiclitellata	Megascolecidae	Metaphire californica (Kinberg, 1867)	22.3206	114.186	WGS84	G	China	Kowloon & New Territories	8 10 2019	autumn	MW525136	COI
494	Annelida	Clitellata	Crassiclitellata	Megascolecidae	Metaphire californica (Kinberg, 1867)	22.3206	114.186	WGS84	G	China	Kowloon & New Territories	8 10 2019	autumn	MW525137	COI
495	Annelida	Clitellata	Crassiclitellata	Megascolecidae	Amynthas robustus (Perrier, 1872)	22.3206	114.186	WGS84	G	China	Kowloon & New Territories	8 10 2019	autumn	MW525138	COI
496	Annelida	Clitellata	Crassiclitellata	Megascolecidae	Amynthas gracilis (Kinberg, 1866)	22.3183	114.1859	WGS84	G	China	Kowloon & New Territories	8 10 2019	autumn	MW525139	COI
497	Annelida	Clitellata	Crassiclitellata	Megascolecidae	Amynthas aspergillus (Perrier, 1872)	22.501	114.1106	WGS84	H	China	Kowloon & New Territories	24 09 2019	autumn	MW525140	COI
498	Annelida	Clitellata	Crassiclitellata	Megascolecidae	Amynthas gracilis (Kinberg, 1866)	22.3044	114.2501	WGS84	I	China	Kowloon & New Territories	2 12 2019	winter	MW525141	COI
499	Annelida	Clitellata	Crassiclitellata	Megascolecidae	Amynthas gracilis (Kinberg, 1866)	22.3044	114.2501	WGS84	I	China	Kowloon & New Territories	6 02 2020	winter	MW525142	COI
500	Annelida	Clitellata	Crassiclitellata	Megascolecidae	Metaphire sp.	22.2868	114.2046	WGS84	M	China	Hong Kong Island	25 11 2019	autumn	MW525143	COI
501	Annelida	Clitellata	Haplotaxida	Glossoscolecidae	Pontoscolex corethrurus (Muller, 1856)	22.2868	114.2046	WGS84	M	China	Hong Kong Island	16 12 2019	winter	MW525144	COI
502	Annelida	Clitellata	Crassiclitellata	Megascolecidae	Amynthas morrisi (Beddard, 1892)	22.4966	114.1414	WGS84	N	China	Kowloon & New Territories	16 10 2019	autumn	MW525145	COI
503	Annelida	Clitellata	Crassiclitellata	Megascolecidae	Amynthas robustus (Perrier, 1872)	22.4966	114.1414	WGS84	N	China	Kowloon & New Territories	30 10 2019	autumn	MW525146	COI
504	Annelida	Clitellata	Crassiclitellata	Megascolecidae	Amynthas morrisi (Beddard, 1892)	22.4966	114.1414	WGS84	N	China	Kowloon & New Territories	21 02 2020	winter	MW525147	COI
505	Annelida	Clitellata	Crassiclitellata	Megascolecidae	Metaphire californica (Kinberg, 1867)	22.453	114.1634	WGS84	O	China	Kowloon & New Territories	15 10 2019	autumn	MW525148	COI
506	Annelida	Clitellata	Crassiclitellata	Megascolecidae	Metaphire californica (Kinberg, 1867)	22.4532	114.1641	WGS84	O	China	Kowloon & New Territories	15 10 2019	autumn	MW525149	COI
507	Annelida	Clitellata	Crassiclitellata	Megascolecidae	Metaphire californica (Kinberg, 1867)	22.4538	114.1631	WGS84	O	China	Kowloon & New Territories	22 11 2019	autumn	MW525150	COI
508	Annelida	Clitellata	Crassiclitellata	Megascolecidae	Metaphire californica (Kinberg, 1867)	22.4538	114.1631	WGS84	O	China	Kowloon & New Territories	19 12 2019	winter	MW525151	COI
509	Annelida	Clitellata	Crassiclitellata	Megascolecidae	Amynthas morrisi (Beddard, 1892)	22.4556	114.1671	WGS84	P	China	Kowloon & New Territories	10 10 2019	autumn	MW525152	COI
510	Annelida	Clitellata	Crassiclitellata	Megascolecidae	Amynthas robustus (Perrier, 1872)	22.4556	114.1671	WGS84	P	China	Kowloon & New Territories	10 10 2019	autumn	MW525153	COI
511	Annelida	Clitellata	Crassiclitellata	Megascolecidae	Metaphire californica (Kinberg, 1867)	22.4545	114.1662	WGS84	P	China	Kowloon & New Territories	10 10 2019	autumn	MW525154	COI
512	Annelida	Clitellata	Crassiclitellata	Megascolecidae	Metaphire californica (Kinberg, 1867)	22.4556	114.1671	WGS84	P	China	Kowloon & New Territories	7 11 2019	autumn	MW525155	COI
513	Annelida	Clitellata	Crassiclitellata	Megascolecidae	Amynthas morrisi (Beddard, 1892)	22.4545	114.1662	WGS84	P	China	Kowloon & New Territories	7 11 2019	autumn	MW525156	COI
514	Annelida	Clitellata	Crassiclitellata	Megascolecidae	Amynthas gracilis (Kinberg, 1866)	22.4553	114.1663	WGS84	P	China	Kowloon & New Territories	7 11 2019	autumn	MW525157	COI
515	Annelida	Clitellata	Crassiclitellata	Megascolecidae	Amynthas gracilis (Kinberg, 1866)	22.4553	114.1663	WGS84	P	China	Kowloon & New Territories	5 12 2019	winter	MW525158	COI
516	Annelida	Clitellata	Crassiclitellata	Megascolecidae	Amynthas morrisi (Beddard, 1892)	22.4553	114.1663	WGS84	P	China	Kowloon & New Territories	5 12 2019	winter	MW525159	COI
517	Annelida	Clitellata	Crassiclitellata	Megascolecidae	Amynthas morrisi (Beddard, 1892)	22.4553	114.1663	WGS84	P	China	Kowloon & New Territories	5 12 2019	winter	MW525160	COI
518	Annelida	Clitellata	Crassiclitellata	Megascolecidae	Metaphire californica (Kinberg, 1867)	22.4553	114.1663	WGS84	P	China	Kowloon & New Territories	18 12 2019	winter	MW525161	COI
519	Annelida	Clitellata	Crassiclitellata	Megascolecidae	Amynthas gracilis (Kinberg, 1866)	22.4553	114.1663	WGS84	P	China	Kowloon & New Territories	18 12 2019	winter	MW525162	COI
520	Annelida	Clitellata	Crassiclitellata	Megascolecidae	Amynthas morrisi (Beddard, 1892)	22.4553	114.1663	WGS84	P	China	Kowloon & New Territories	18 12 2019	winter	MW525163	COI
521	Annelida	Clitellata	Crassiclitellata	Megascolecidae	Megascolecidae sp.	22.4545	114.1662	WGS84	P	China	Kowloon & New Territories	21 02 2020	winter	MW525164	COI
522	Annelida	Clitellata	Crassiclitellata	Megascolecidae	Amynthas morrisi (Beddard, 1892)	22.4553	114.1663	WGS84	P	China	Kowloon & New Territories	12 03 2020	spring	MW525165	COI
523	Annelida	Clitellata	Crassiclitellata	Megascolecidae	Metaphire californica (Kinberg, 1867)	22.4553	114.1663	WGS84	P	China	Kowloon & New Territories	22 04 2020	spring	MW525166	COI
524	Annelida	Clitellata	Crassiclitellata	Megascolecidae	Metaphire californica (Kinberg, 1867)	22.4553	114.1663	WGS84	P	China	Kowloon & New Territories	22 04 2020	spring	MW525167	COI
525	Annelida	Clitellata	Crassiclitellata	Megascolecidae	Amynthas morrisi (Beddard, 1892)	22.4593	114.0033	WGS84	Q	China	Kowloon & New Territories	17 10 2019	autumn	MW525168	COI
526	Annelida	Clitellata	Crassiclitellata	Megascolecidae	Amynthas morrisi (Beddard, 1892)	22.4593	114.0033	WGS84	Q	China	Kowloon & New Territories	17 10 2019	autumn	MW525169	COI
527	Annelida	Clitellata	Crassiclitellata	Megascolecidae	Metaphire californica (Kinberg, 1867)	22.4577	114.003	WGS84	Q	China	Kowloon & New Territories	18 12 2019	winter	MW525170	COI
528	Annelida	Clitellata	Crassiclitellata	Megascolecidae	Metaphire californica (Kinberg, 1867)	22.4577	114.003	WGS84	Q	China	Kowloon & New Territories	23 01 2020	winter	MW525171	COI
529	Annelida	Clitellata	Crassiclitellata	Megascolecidae	Megascolecidae sp.	22.4591	114.0033	WGS84	Q	China	Kowloon & New Territories	20 02 2020	winter	MW525172	COI
530	Annelida	Clitellata	Crassiclitellata	Megascolecidae	Megascolecidae sp.	22.4577	114.003	WGS84	Q	China	Kowloon & New Territories	20 02 2020	winter	MW525173	COI
531	Annelida	Clitellata	Crassiclitellata	Megascolecidae	Amynthas morrisi (Beddard, 1892)	22.4593	114.0033	WGS84	Q	China	Kowloon & New Territories	11 03 2020	spring	MW525174	COI
532	Annelida	Clitellata	Crassiclitellata	Megascolecidae	Amynthas gracilis (Kinberg, 1866)	22.4425	114.0229	WGS84	R	China	Kowloon & New Territories	18 10 2019	autumn	MW525175	COI
533	Annelida	Clitellata	Crassiclitellata	Megascolecidae	Amynthas gracilis (Kinberg, 1866)	22.444	114.0234	WGS84	R	China	Kowloon & New Territories	5 12 2019	winter	MW525176	COI
534	Annelida	Clitellata	Crassiclitellata	Megascolecidae	Metaphire californica (Kinberg, 1867)	22.4425	114.0229	WGS84	R	China	Kowloon & New Territories	19 12 2019	winter	MW525177	COI
535	Annelida	Clitellata	Crassiclitellata	Megascolecidae	Amynthas morrisi (Beddard, 1892)	22.4425	114.0229	WGS84	R	China	Kowloon & New Territories	19 12 2019	winter	MW525178	COI
536	Annelida	Clitellata	Crassiclitellata	Megascolecidae	Metaphire californica (Kinberg, 1867)	22.4425	114.0229	WGS84	R	China	Kowloon & New Territories	19 12 2019	winter	MW525179	COI
537	Annelida	Clitellata	Crassiclitellata	Megascolecidae	Metaphire californica (Kinberg, 1867)	22.444	114.0234	WGS84	R	China	Kowloon & New Territories	20 02 2020	winter	MW525180	COI
538	Annelida	Clitellata	Haplotaxida		Haplotaxida sp.	22.444	114.0234	WGS84	R	China	Kowloon & New Territories	20 02 2020	winter	MW525181	COI
539	Annelida	Clitellata	Crassiclitellata	Megascolecidae	Metaphire californica (Kinberg, 1867)	22.4411	114.0345	WGS84	S	China	Kowloon & New Territories	18 10 2019	autumn	MW525182	COI
540	Annelida	Clitellata	Crassiclitellata	Megascolecidae	Amynthas morrisi (Beddard, 1892)	22.4411	114.0345	WGS84	S	China	Kowloon & New Territories	18 10 2019	autumn	MW525183	COI
541	Annelida	Clitellata	Crassiclitellata	Megascolecidae	Amynthas morrisi (Beddard, 1892)	22.4411	114.0345	WGS84	S	China	Kowloon & New Territories	18 10 2019	autumn	MW525184	COI
542	Annelida	Clitellata	Crassiclitellata	Megascolecidae	Amynthas gracilis (Kinberg, 1866)	22.4423	114.0343	WGS84	S	China	Kowloon & New Territories	18 10 2019	autumn	MW525185	COI
543	Annelida	Clitellata	Crassiclitellata	Megascolecidae	Metaphire californica (Kinberg, 1867)	22.4423	114.0343	WGS84	S	China	Kowloon & New Territories	18 10 2019	autumn	MW525186	COI
544	Annelida	Clitellata	Crassiclitellata	Megascolecidae	Amynthas morrisi (Beddard, 1892)	22.4423	114.0343	WGS84	S	China	Kowloon & New Territories	22 11 2019	autumn	MW525187	COI
545	Annelida	Clitellata	Crassiclitellata	Megascolecidae	Amynthas morrisi (Beddard, 1892)	22.4411	114.0345	WGS84	S	China	Kowloon & New Territories	29 11 2019	autumn	MW525188	COI
546	Annelida	Clitellata	Crassiclitellata	Megascolecidae	Amynthas morrisi (Beddard, 1892)	22.4411	114.0345	WGS84	S	China	Kowloon & New Territories	29 11 2019	autumn	MW525189	COI
547	Annelida	Clitellata	Crassiclitellata	Megascolecidae	Metaphire californica (Kinberg, 1867)	22.4411	114.0345	WGS84	S	China	Kowloon & New Territories	29 11 2019	autumn	MW525190	COI
548	Annelida	Clitellata	Crassiclitellata	Megascolecidae	Amynthas morrisi (Beddard, 1892)	22.4411	114.0345	WGS84	S	China	Kowloon & New Territories	29 11 2019	autumn	MW525191	COI
549	Annelida	Clitellata	Crassiclitellata	Megascolecidae	Amynthas morrisi (Beddard, 1892)	22.4411	114.0345	WGS84	S	China	Kowloon & New Territories	29 11 2019	autumn	MW525192	COI
550	Arthropoda	Insecta	Blattodea	Blaberidae	Blattella bisignata (Brunner von Wattenwyl, 1893)	22.4173	114.2068	WGS84	U	China	Kowloon & New Territories	2 03 2020	spring	MW525261	COI
551	Arthropoda	Insecta	Coleoptera		Coleoptera sp.	22.2145	114.2159	WGS84	C	China	Hong Kong Island	7 04 2020	spring	MW525262	COI
552	Arthropoda	Insecta	Coleoptera		Coleoptera sp.	22.2145	114.2159	WGS84	C	China	Hong Kong Island	7 04 2020	spring	MW525263	COI
553	Arthropoda	Insecta	Coleoptera		Coleoptera sp.	22.2906	113.945	WGS84	D	China	Islands	25 08 2020	summer	MW525264	COI
554	Arthropoda	Insecta	Coleoptera		Coleoptera sp.	22.3961	113.9643	WGS84	E	China	Kowloon & New Territories	22 05 2020	spring	MW525265	COI
555	Arthropoda	Insecta	Coleoptera		Coleoptera sp.	22.3957	113.9636	WGS84	E	China	Kowloon & New Territories	22 09 2020	autumn	MW525266	COI
556	Arthropoda	Insecta	Coleoptera		Coleoptera sp.	22.3957	113.9636	WGS84	E	China	Kowloon & New Territories	22 09 2020	autumn	MW525267	COI
557	Arthropoda	Insecta	Coleoptera		Coleoptera sp.	22.3367	114.1954	WGS84	F	China	Kowloon & New Territories	24 03 2020	spring	MW525268	COI
558	Arthropoda	Insecta	Coleoptera		Coleoptera sp.	22.3162	114.185	WGS84	G	China	Kowloon & New Territories	24 02 2020	winter	MW525269	COI
559	Arthropoda	Insecta	Coleoptera		Coleoptera sp.	22.3044	114.2501	WGS84	I	China	Kowloon & New Territories	6 02 2020	winter	MW525270	COI
560	Arthropoda	Insecta	Coleoptera		Coleoptera sp.	22.3044	114.2501	WGS84	I	China	Kowloon & New Territories	6 02 2020	winter	MW525271	COI
561	Arthropoda	Insecta	Coleoptera		Coleoptera sp.	22.2868	114.2046	WGS84	M	China	Hong Kong Island	4 12 2019	winter	MW525272	COI
562	Arthropoda	Insecta	Coleoptera		Coleoptera sp.	22.287	114.2044	WGS84	M	China	Hong Kong Island	8 01 2020	winter	MW525273	COI
563	Arthropoda	Insecta	Coleoptera		Coleoptera sp.	22.4973	114.1418	WGS84	N	China	Kowloon & New Territories	20 01 2020	winter	MW525274	COI
564	Arthropoda	Insecta	Coleoptera		Coleoptera sp.	22.4973	114.1418	WGS84	N	China	Kowloon & New Territories	20 01 2020	winter	MW525275	COI
565	Arthropoda	Insecta	Coleoptera		Coleoptera sp.	22.4973	114.1418	WGS84	N	China	Kowloon & New Territories	21 02 2020	winter	MW525276	COI
566	Arthropoda	Insecta	Coleoptera		Coleoptera sp.	22.4966	114.1414	WGS84	N	China	Kowloon & New Territories	21 02 2020	winter	MW525277	COI
567	Arthropoda	Insecta	Coleoptera		Coleoptera sp.	22.4545	114.1662	WGS84	P	China	Kowloon & New Territories	21 02 2020	winter	MW525278	COI
568	Arthropoda	Insecta	Coleoptera		Coleoptera sp.	22.4545	114.1662	WGS84	P	China	Kowloon & New Territories	12 03 2020	spring	MW525279	COI
569	Arthropoda	Insecta	Coleoptera		Coleoptera sp.	22.4553	114.1663	WGS84	P	China	Kowloon & New Territories	12 03 2020	spring	MW525280	COI
570	Arthropoda	Insecta	Coleoptera		Coleoptera sp.	22.4425	114.0229	WGS84	R	China	Kowloon & New Territories	5 12 2019	winter	MW525281	COI
571	Arthropoda	Insecta	Blattodea	Blaberidae	Blattella bisignata (Brunner von Wattenwyl, 1893)	22.3743	114.1925	WGS84	A	China	Kowloon & New Territories	12 03 2020	spring	MW535105	COI
572	Arthropoda	Insecta	Blattodea	Blaberidae	Blattella singularis	22.3743	114.1925	WGS84	A	China	Kowloon & New Territories	26 03 2020	spring	MW535106	COI
573	Arthropoda	Insecta	Blattodea	Blaberidae	Pycnoscelus surinamensis (Linnaeus, 1758)	22.2866	114.1375	WGS84	B	China	Hong Kong Island	27 09 2019	autumn	MW535107	COI
574	Arthropoda	Insecta	Blattodea	Blaberidae	Pycnoscelus surinamensis (Linnaeus, 1758)	22.2866	114.1375	WGS84	B	China	Hong Kong Island	25 03 2020	spring	MW535108	COI
575	Arthropoda	Insecta	Blattodea	Blaberidae	Pycnoscelus surinamensis (Linnaeus, 1758)	22.2866	114.1375	WGS84	B	China	Hong Kong Island	25 03 2020	spring	MW535109	COI
576	Arthropoda	Insecta	Blattodea	Blaberidae	Opisthoplatia orientalis (Burmeister, 1838)	22.2145	114.2159	WGS84	C	China	Hong Kong Island	7 11 2019	autumn	MW535110	COI
577	Arthropoda	Insecta	Blattodea	Blaberidae	Pycnoscelus surinamensis (Linnaeus, 1758)	22.2121	114.2174	WGS84	C	China	Hong Kong Island	21 11 2019	autumn	MW535111	COI
578	Arthropoda	Insecta	Blattodea	Blaberidae	Opisthoplatia orientalis (Burmeister, 1838)	22.2166	114.2143	WGS84	C	China	Hong Kong Island	6 12 2019	winter	MW535112	COI
579	Arthropoda	Insecta	Blattodea	Blaberidae	Pycnoscelus surinamensis (Linnaeus, 1758)	22.2145	114.2159	WGS84	C	China	Hong Kong Island	28 02 2020	winter	MW535113	COI
580	Arthropoda	Insecta	Blattodea	Blaberidae	Pycnoscelus surinamensis (Linnaeus, 1758)	22.2145	114.2159	WGS84	C	China	Hong Kong Island	7 04 2020	spring	MW535114	COI
581	Arthropoda	Insecta	Blattodea	Blaberidae	Pycnoscelus surinamensis (Linnaeus, 1758)	22.3961	113.9643	WGS84	E	China	Kowloon & New Territories	11 03 2020	spring	MW535115	COI
582	Arthropoda	Insecta	Blattodea	Blaberidae	Pycnoscelus surinamensis (Linnaeus, 1758)	22.3961	113.9643	WGS84	E	China	Kowloon & New Territories	28 04 2020	spring	MW535116	COI
583	Arthropoda	Insecta	Blattodea	Blaberidae	Pycnoscelus surinamensis (Linnaeus, 1758)	22.3957	113.9636	WGS84	E	China	Kowloon & New Territories	28 04 2020	spring	MW535117	COI
584	Arthropoda	Insecta	Blattodea	Blaberidae	Pycnoscelus surinamensis (Linnaeus, 1758)	22.3367	114.1954	WGS84	F	China	Kowloon & New Territories	20 12 2019	winter	MW535118	COI
585	Arthropoda	Insecta	Blattodea	Blaberidae	Pycnoscelus surinamensis (Linnaeus, 1758)	22.3367	114.1954	WGS84	F	China	Kowloon & New Territories	20 12 2019	winter	MW535119	COI
586	Arthropoda	Insecta	Blattodea	Blaberidae	Pycnoscelus surinamensis (Linnaeus, 1758)	22.3206	114.186	WGS84	G	China	Kowloon & New Territories	8 10 2019	autumn	MW535120	COI
587	Arthropoda	Insecta	Blattodea	Blaberidae	Pycnoscelus surinamensis (Linnaeus, 1758)	22.3206	114.186	WGS84	G	China	Kowloon & New Territories	23 12 2019	winter	MW535121	COI
588	Arthropoda	Insecta	Blattodea	Blaberidae	Pycnoscelus surinamensis (Linnaeus, 1758)	22.5017	114.1107	WGS84	H	China	Kowloon & New Territories	24 09 2019	autumn	MW535122	COI
589	Arthropoda	Insecta	Blattodea	Blaberidae	Blattella bisignata (Brunner von Wattenwyl, 1893)	22.501	114.1106	WGS84	H	China	Kowloon & New Territories	24 09 2019	autumn	MW535123	COI
590	Arthropoda	Insecta	Blattodea	Blaberidae	Pycnoscelus surinamensis (Linnaeus, 1758)	22.501	114.1106	WGS84	H	China	Kowloon & New Territories	24 09 2019	autumn	MW535124	COI
591	Arthropoda	Insecta	Blattodea	Blaberidae	Pycnoscelus surinamensis (Linnaeus, 1758)	22.5017	114.1107	WGS84	H	China	Kowloon & New Territories	10 12 2019	winter	MW535125	COI
592	Arthropoda	Insecta	Blattodea	Blaberidae	Opisthoplatia orientalis (Burmeister, 1838)	22.3196	114.219	WGS84	K	China	Kowloon & New Territories	29 11 2019	autumn	MW535126	COI
593	Arthropoda	Insecta	Blattodea	Blaberidae	Pycnoscelus surinamensis (Linnaeus, 1758)	22.3196	114.219	WGS84	K	China	Kowloon & New Territories	6 12 2019	winter	MW535127	COI
594	Arthropoda	Insecta	Blattodea	Blaberidae	Pycnoscelus surinamensis (Linnaeus, 1758)	22.2654	114.2426	WGS84	L	China	Hong Kong Island	6 11 2019	autumn	MW535128	COI
595	Arthropoda	Insecta	Blattodea	Blaberidae	Blattella bisignata (Brunner von Wattenwyl, 1893)	22.2868	114.2046	WGS84	M	China	Hong Kong Island	4 12 2019	winter	MW535129	COI
596	Arthropoda	Insecta	Blattodea	Blaberidae	Pycnoscelus surinamensis (Linnaeus, 1758)	22.2868	114.2046	WGS84	M	China	Hong Kong Island	8 01 2020	winter	MW535130	COI
597	Arthropoda	Insecta	Blattodea	Blaberidae	Pycnoscelus surinamensis (Linnaeus, 1758)	22.287	114.2044	WGS84	M	China	Hong Kong Island	14 01 2020	winter	MW535131	COI
598	Arthropoda	Insecta	Blattodea	Blaberidae	Pycnoscelus surinamensis (Linnaeus, 1758)	22.2868	114.2046	WGS84	M	China	Hong Kong Island	14 01 2020	winter	MW535132	COI
599	Arthropoda	Insecta	Blattodea	Blaberidae	Pycnoscelus surinamensis (Linnaeus, 1758)	22.2868	114.2046	WGS84	M	China	Hong Kong Island	6 02 2020	winter	MW535133	COI
600	Arthropoda	Insecta	Blattodea	Blaberidae	Pycnoscelus surinamensis (Linnaeus, 1758)	22.4966	114.1414	WGS84	N	China	Kowloon & New Territories	28 11 2019	autumn	MW535134	COI
601	Arthropoda	Insecta	Blattodea	Blaberidae	Pycnoscelus surinamensis (Linnaeus, 1758)	22.4532	114.1641	WGS84	O	China	Kowloon & New Territories	15 10 2019	autumn	MW535135	COI
602	Arthropoda	Insecta	Blattodea	Blaberidae	Pycnoscelus surinamensis (Linnaeus, 1758)	22.4538	114.1631	WGS84	O	China	Kowloon & New Territories	22 11 2019	autumn	MW535136	COI
603	Arthropoda	Insecta	Blattodea	Blaberidae	Pycnoscelus surinamensis (Linnaeus, 1758)	22.4538	114.1631	WGS84	O	China	Kowloon & New Territories	19 12 2019	winter	MW535137	COI
604	Arthropoda	Insecta	Blattodea	Blaberidae	Pycnoscelus surinamensis (Linnaeus, 1758)	22.4538	114.1631	WGS84	O	China	Kowloon & New Territories	12 03 2020	spring	MW535138	COI
605	Arthropoda	Insecta	Blattodea	Blaberidae	Pycnoscelus surinamensis (Linnaeus, 1758)	22.4538	114.1631	WGS84	O	China	Kowloon & New Territories	26 03 2020	spring	MW535139	COI
606	Arthropoda	Insecta	Blattodea	Blaberidae	Pycnoscelus surinamensis (Linnaeus, 1758)	22.4538	114.1631	WGS84	O	China	Kowloon & New Territories	22 04 2020	spring	MW535140	COI
607	Arthropoda	Insecta	Blattodea	Blaberidae	Pycnoscelus surinamensis (Linnaeus, 1758)	22.4538	114.1631	WGS84	O	China	Kowloon & New Territories	22 04 2020	spring	MW535141	COI
608	Arthropoda	Insecta	Blattodea	Blaberidae	Pycnoscelus surinamensis (Linnaeus, 1758)	22.4545	114.1662	WGS84	P	China	Kowloon & New Territories	10 10 2019	autumn	MW535142	COI
609	Arthropoda	Insecta	Blattodea	Termitidae	Odontotermes formosanus (Shiraki, 1909)	22.3162	114.185	WGS84	G	China	Kowloon & New Territories	24 03 2020	spring	MW535143	COI
610	Arthropoda	Insecta	Blattodea	Termitidae	Odontotermes formosanus (Shiraki, 1909)	22.4545	114.1662	WGS84	P	China	Kowloon & New Territories	21 02 2020	winter	MW535144	COI
611	Arthropoda	Insecta	Orthoptera		Orthoptera sp.	22.2052	114.0372	WGS84	T	China	Islands	28 05 2020	spring	MW535145	COI
612	Arthropoda	Insecta	Lepidoptera	Erebidae	Orvasca subnotata (Walker, 1865)	22.2868	114.2046	WGS84	M	China	Hong Kong Island	16 12 2019	winter	MW535146	COI
613	Arthropoda	Insecta	Lepidoptera	Erebidae	Orvasca subnotata (Walker, 1865)	22.4973	114.1418	WGS84	N	China	Kowloon & New Territories	8 10 2020	autumn	MW535147	COI
614	Arthropoda	Arachnida	Araneae	Linyphiidae	Parameioneta tricolorata (Zhao & Li, 2014)	22.3957	113.9636	WGS84	E	China	Kowloon & New Territories	11 03 2020	spring	MW535148	COI
615	Arthropoda	Arachnida	Araneae	Lycosidae	Pirata procurvus (F�russac, 1822)	22.3957	113.9636	WGS84	E	China	Kowloon & New Territories	30 12 2019	winter	MW535149	COI
616	Arthropoda	Arachnida	Araneae	Lycosidae	Pirata procurvus (F�russac, 1822)	22.3957	113.9636	WGS84	E	China	Kowloon & New Territories	20 02 2020	winter	MW535150	COI
617	Arthropoda	Arachnida	Araneae	Lycosidae	Pirata procurvus (F�russac, 1822)	22.3961	113.9643	WGS84	E	China	Kowloon & New Territories	28 04 2020	spring	MW535151	COI
618	Arthropoda	Arachnida	Araneae	Lycosidae	Pirata procurvus (F�russac, 1822)	22.2868	114.2046	WGS84	M	China	Hong Kong Island	25 03 2020	spring	MW535152	COI
619	Arthropoda	Arachnida	Araneae	Lycosidae	Pirata procurvus (F�russac, 1822)	22.4173	114.2068	WGS84	U	China	Kowloon & New Territories	16 09 2019	autumn	MW535153	COI
620	Arthropoda	Arachnida	Araneae	Lycosidae	Pirata procurvus (F�russac, 1822)	22.4173	114.2068	WGS84	U	China	Kowloon & New Territories	5 10 2019	autumn	MW535154	COI
621	Arthropoda	Arachnida	Araneae	Lycosidae	Pirata procurvus (F�russac, 1822)	22.4173	114.2068	WGS84	U	China	Kowloon & New Territories	14 01 2020	winter	MW535155	COI
622	Arthropoda	Arachnida	Araneae	Lycosidae	Pirata procurvus (F�russac, 1822)	22.4173	114.2068	WGS84	U	China	Kowloon & New Territories	4 02 2020	winter	MW535156	COI
623	Arthropoda	Arachnida	Araneae	Lycosidae	Pirata procurvus (F�russac, 1822)	22.4173	114.2068	WGS84	U	China	Kowloon & New Territories	23 03 2020	spring	MW535157	COI
624	Arthropoda	Arachnida	Araneae	Theridiidae	Steatoda cingulata (Thorell, 1890)	22.3743	114.1925	WGS84	A	China	Kowloon & New Territories	26 03 2020	spring	MW535158	COI
625	Arthropoda	Arachnida	Araneae	Theridiidae	Steatoda cingulata (Thorell, 1890)	22.3743	114.1925	WGS84	A	China	Kowloon & New Territories	21 07 2020	summer	MW535159	COI
626	Arthropoda	Arachnida	Araneae	Lycosidae	Trochosa aquatica (Tanaka, 1985)	22.2166	114.2143	WGS84	C	China	Hong Kong Island	17 12 2019	winter	MW535160	COI
627	Arthropoda	Arachnida	Araneae	Lycosidae	Trochosa aquatica (Tanaka, 1985)	22.2166	114.2143	WGS84	C	China	Hong Kong Island	7 04 2020	spring	MW535161	COI
628	Arthropoda	Insecta	Lepidoptera	Erebidae	Amata sp.	22.3957	113.9636	WGS84	E	China	Kowloon & New Territories	22 05 2020	spring	MW549753	COI
629	Arthropoda	Arachnida	Araneae		Araneae sp.	22.5017	114.1107	WGS84	H	China	Kowloon & New Territories	31 08 2020	summer	MW549754	COI
630	Arthropoda	Arachnida	Araneae		Araneae sp.	22.2868	114.2046	WGS84	M	China	Hong Kong Island	25 11 2019	autumn	MW549755	COI
631	Arthropoda	Arachnida	Araneae		Araneae sp.	22.2071	114.0374	WGS84	T	China	Islands	28 05 2020	spring	MW549756	COI
632	Arthropoda	Insecta	Lepidoptera	Noctuidae	Athetis thoracica (Moore, 1884)	22.3957	113.9636	WGS84	E	China	Kowloon & New Territories	22 05 2020	spring	MW549757	COI
633	Mollusca	Gastropoda	Stylommatophora	Bradybaenidae	Bradybaena similaris (F�russac, 1822)	22.2866	114.1375	WGS84	B	China	Hong Kong Island	20 12 2019	winter	MW549758	COI
634	Mollusca	Gastropoda	Stylommatophora	Bradybaenidae	Bradybaena similaris (F�russac, 1822)	22.2906	113.945	WGS84	D	China	Islands	25 08 2020	summer	MW549759	COI
635	Arthropoda	Malacostraca	Isopoda	Philosciidae	Burmoniscus kathmandius (Schmalfuss, 1983)	22.4173	114.2068	WGS84	U	China	Kowloon & New Territories	19 02 2020	winter	MW549760	COI
636	Arthropoda	Arachnida	Araneae	Theridiidae	Coleosoma floridanum (Banks, 1900)	22.4973	114.1418	WGS84	N	China	Kowloon & New Territories	10 06 2020	summer	MW549761	COI
637	Arthropoda	Insecta	Lepidoptera	Erebidae	Euproctis sp.	22.4173	114.2068	WGS84	U	China	Kowloon & New Territories	16 09 2019	autumn	MW549762	COI
638	Arthropoda	Arachnida	Araneae	Oonopidae	Ischnothyreus peltifer (Simon, 1892)	22.4173	114.2068	WGS84	U	China	Kowloon & New Territories	14 01 2020	winter	MW549763	COI
639	Arthropoda	Insecta	Lepidoptera		Lepidoptera sp.	22.4973	114.1418	WGS84	N	China	Kowloon & New Territories	10 06 2020	summer	MW549764	COI
640	Arthropoda	Insecta	Blattodea	Termitidae	Macrotermes longimentis (Luo & Zhu, 1987)	22.2071	114.0374	WGS84	T	China	Islands	28 05 2020	spring	MW549765	COI
641	Arthropoda	Insecta	Mantodea		Mantodea sp.	22.2868	114.2046	WGS84	M	China	Hong Kong Island	16 12 2019	winter	MW549766	COI
642	Arthropoda	Arachnida	Araneae	Linyphiidae	Nasoona crucifera (Thorell, 1895)	22.4173	114.2068	WGS84	U	China	Kowloon & New Territories	2 03 2020	spring	MW549767	COI
643	Arthropoda	Arachnida	Araneae	Sparassidae	Neostasina bicolor (Banks, 1914)	22.4173	114.2068	WGS84	U	China	Kowloon & New Territories	5 10 2019	autumn	MW549768	COI
644	Arthropoda	Insecta	Lepidoptera	Erebidae	Nyctemera adversata (Schaller, 1788)	22.3044	114.2501	WGS84	I	China	Kowloon & New Territories	4 11 2019	autumn	MW549769	COI
645	Arthropoda	Diplopoda	Spirobolida	Pseudospirobolellidae	Pseudospirobolellus avernus (Butler, 1876)	22.2166	114.2143	WGS84	C	China	Hong Kong Island	28 02 2020	winter	MW385240	COI
646	Arthropoda	Diplopoda	Spirobolida	Pseudospirobolellidae	Pseudospirobolellus avernus (Butler, 1876)	22.287	114.2044	WGS84	M	China	Hong Kong Island	20 05 2020	spring	MW385241	COI
647	Arthropoda	Diplopoda	Polyzoniida	Siphonotidae	Rhinotus purpureus (Pocock, 1894)	22.4577	114.003	WGS84	Q	China	Kowloon & New Territories	22 05 2020	spring
648	Arthropoda	Diplopoda	Polyzoniida	Siphonotidae	Rhinotus purpureus (Pocock, 1894)	22.4577	114.003	WGS84	Q	China	Kowloon & New Territories	25 08 2020	summer
649	Arthropoda	Diplopoda	Polyzoniida	Siphonotidae	Rhinotus purpureus (Pocock, 1894)	22.3367	114.1954	WGS84	F	China	Kowloon & New Territories	18 02 2020	winter
